# Supplementary material for: Associations between antinuclear antibody staining patterns and clinical features of systemic lupus erythematosus: analysis of a regional Swedish register
Source: PubMed Central journal article supplement — BMJ Open. 2013 Oct 25;3(10):e003608. doi: 10.1136/bmjopen-2013-003608 (PMC3808756; doi:10.1136/bmjopen-2013-003608), 2013-10-25
Supplement: bmjopen-2013-003608.draft_revisions.pdf [file bmjopen-2013-003608.draft_revisions.pdf]

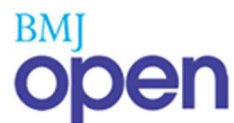

**Associations between antinuclear antibody staining patterns and clinical features of systemic lupus erythematosus: analysis of a regional Swedish register**

|                                 |                                                                                                                                             |
|---------------------------------|---------------------------------------------------------------------------------------------------------------------------------------------|
| Journal:                        | <i>BMJ Open</i>                                                                                                                             |
| Manuscript ID:                  | bmjopen-2013-003608                                                                                                                         |
| Article Type:                   | Research                                                                                                                                    |
| Date Submitted by the Author:   | 16-Jul-2013                                                                                                                                 |
| Complete List of Authors:       | Frodlund, Martina<br>Dahlström, Örjan<br>Kastbom, Alf<br>Skogh, Thomas<br>Sjöwall, Christopher; IKE, Linköping university, AIR/Rheumatology |
| <b>Primary Subject Heading</b>: | Rheumatology                                                                                                                                |
| Secondary Subject Heading:      | Immunology (including allergy)                                                                                                              |
| Keywords:                       | Antinuclear antibodies, Immunofluorescence microscopy, Systemic lupus erythematosus, Organ damage, SSA                                      |
|                                 |                                                                                                                                             |

SCHOLARONE™  
Manuscripts

**TITLE PAGE**

**Manuscript title:** Associations between antinuclear antibody staining patterns and clinical features of systemic lupus erythematosus: analysis of a regional Swedish register

**Authors:** Martina Frodlund, MD<sup>1</sup>; Örjan Dahlström, PhD<sup>2</sup>; Alf Kastbom, MD PhD<sup>1</sup>; Thomas Skogh, MD PhD<sup>1</sup>; Christopher Sjöwall, MD PhD<sup>1\*</sup>

1. Rheumatology/AIR, Department of Clinical and Experimental Medicine, Linköping University, Linköping
2. Linneaus Centre HEAD, Swedish Institute for Disability Research, Department of Behavioural Sciences and Learning, Linköping University, Linköping, Sweden

**\* Corresponding author:**

Rheumatology Unit, University Hospital, SE-581 85 Linköping, Sweden

E-mail address: [christopher.sjowall@liu.se](mailto:christopher.sjowall@liu.se)

Telephone +46 10 1032416

Fax: +46 10 1031844

**Running head:** ANA staining patterns *versus* SLE phenotypes

**Keywords:** Antinuclear antibodies; Immunofluorescence microscopy; Systemic lupus erythematosus; Organ damage; SSA

**Word count:** 2825

**ABSTRACT**

**Objective.** Antinuclear antibody (ANA) analysis by immunofluorescence (IF) microscopy remains a diagnostic hallmark of systemic lupus erythematosus (SLE). The clinical relevance of ANA fine-specificities in SLE has been addressed repeatedly, whereas studies on IF-ANA staining patterns in relation to disease manifestations are very scarce. This study was done to elucidate whether different staining patterns associate with distinct SLE phenotypes.

**Design:** Observational cohort study.

**Setting:** One university hospital rheumatology unit in Sweden.

**Participants:** The study population consisted of 222 cases (89% women; 93% Caucasians), whereof 178 met  $\geq 4/11$  of the 1982 American College of Rheumatology criteria (ACR-82). The remaining 20% had an SLE diagnosis based on positive IF-ANA (HEp-2 cells) and  $\geq 2$  typical organ manifestations at the time of diagnosis (Fries' criteria).

**Outcome measures:** The IF-ANA staining patterns homogenous (H-ANA), speckled (S-ANA), combined H+S (HS-ANA), centromeric (C-ANA), nucleolar±other patterns (N-ANA), and other nuclear patterns (oANA) were related to disease manifestations and laboratory measures. Antigen-specificities were also considered regarding double-stranded DNA (*Crithidia luciliae*) and the following extractable nuclear antigens: SS-A/Ro, SS-B/La, Sm, snRNP, Scl-70 and Jo-1 (immunodiffusion and/or line-blot technique).

**Results:** 54% of the SLE patients displayed H-ANA, 22% S-ANA, 11% HS-ANA, 9% N-ANA, 1% C-ANA, 2% oANA and 1% were never ANA positive. Staining patterns among patients meeting Fries' criteria alone did not differ from those fulfilling ACR-82. H-ANA was significantly associated with ACR-82 criterion 10 ('immunologic disorder'). S-ANA was inversely associated with arthritis, 'immunologic disorder' and signs of organ damage.

**Conclusions.** H-ANA is the dominant IF-ANA pattern among Swedish SLE patients, and was found to associate with 'immunologic disorder' according to ACR-82. The second most common pattern, S-ANA, associated negatively with arthritis and organ damage.

**ABSTRACT SUMMARY****Article focus:**

- The use of IF microscopy to identify ANA was introduced in the early 1950's, and this technique still remains the gold standard for ANA diagnostics when screening for autoimmune diseases such as SLE.
- Different IF-ANA staining patterns arise depending on the nuclear antigens targeted and, to some extent, the nuclear staining patterns can have diagnostic implications.
- Herein, we asked if the IF-ANA staining pattern of well-characterized SLE patients included in a regional Swedish register contain any valuable clinical information regarding distinct SLE phenotypes.

**Key messages:**

- Regardless of the number of fulfilled ACR-82 criteria, H-ANA was the most common IF-ANA pattern among Swedish SLE patients; and this staining was strongly associated with 'immunologic disorder' and anti-dsDNA antibodies.
- S-ANA was the second most common pattern and associated negatively with arthritis and organ damage. These intriguing findings are novel and need to be replicated.
- As previously shown by others, photosensitivity was significantly associated with anti-SSA antibodies. On the contrary, arthritis was less common among patients with anti-SSA antibodies.

**Strengths and limitations of this study:**

- The large study population with thoroughly organized data and very few internal missing values constitute the strength of this study.

- 1
  - 2
  - 3
  - 4
  - 5
  - 6
  - 7
  - 8
  - 9
  - 10
  - 11
  - 12
  - 13
  - 14
  - 15
  - 16
  - 17
  - 18
  - 19
  - 20
  - 21
  - 22
  - 23
  - 24
  - 25
  - 26
  - 27
  - 28
  - 29
  - 30
  - 31
  - 32
  - 33
  - 34
  - 35
  - 36
  - 37
  - 38
  - 39
  - 40
  - 41
  - 42
  - 43
  - 44
  - 45
  - 46
  - 47
  - 48
  - 49
  - 50
  - 51
  - 52
  - 53
  - 54
  - 55
  - 56
  - 57
  - 58
  - 59
  - 60
- Although this study confirmed several known associations between serological findings and clinical features, it did not have the power to allow comparisons with specific types of cutaneous lupus, renal disease, central or peripheral nervous system manifestations, as well as with clinical features not included in the ACR criteria.

For peer review only

## INTRODUCTION

The clinical spectrum of systemic lupus erythematosus (SLE) is exceedingly variable with an unpredictable disease course characteristically with episodes of flares and remissions. Ongoing disease exacerbations and cumulative damage/dysfunction over time can significantly interfere with quality of life [1]. Organ systems most commonly involved in SLE include joints, skin, mucous membranes, bone marrow, and kidneys. Despite the considerable differences between SLE patients, the occurrence of antinuclear antibodies (ANA) in serum at the time of diagnosis is a common finding with very few exceptions [2].

An “abnormal titer” of ANA assessed by immunofluorescence (IF) microscopy (IF-ANA) is one of the 11 criteria for SLE according to the 1982 American College of Rheumatology (ACR-82) validated classification criteria [3] as well as the 1997 revised criteria [4]. Also the recently proposed Systemic Lupus International Collaborating Clinics (SLICC) criteria state that an ANA test “above the laboratory reference value” remains a criterion for SLE, but without specifying the method for ANA assessment [5]. Unfortunately, none of the classification grounds state how to define the cut-off level for ANA. Similar to the definition of a positive rheumatoid factor test according to the 1987 ACR classification criteria for rheumatoid arthritis (RA) [6], we advocate a cut-off level of >95<sup>th</sup> percentile among healthy female blood donors to define an abnormal level of ANA analyzed by indirect IF microscopy utilizing fixed HEp-2 cells as source of nuclear antigens and, importantly, gamma-chain specific secondary antibodies to pinpoint IgG-class IF-ANA [7]. At this cut-off level, ANA has very high diagnostic sensitivity for SLE, but low diagnostic specificity, with close to 5% prevalence among healthy female blood

1  
2  
3 donors [8]. Accordingly, ANA testing should only be done upon fair clinical indications of  
4  
5 ANA-related disease [9].  
6  
7

8  
9  
10 Nuclear constituents such as histone proteins, double-stranded (ds) DNA, DNA/histone  
11  
12 complexes (nucleosomes), various nuclear enzymes and other  
13  
14 proteins/ribonucleoproteins are common target antigens for ANA. On the basis of their  
15  
16 different intra-nuclear distributions, IF-ANA staining patterns can be subdivided into  
17  
18 homogenous /chromosomal (H-ANA), centromeric (C-ANA),  
19  
20 speckled/extrachromosomal (S-ANA), nucleolar (N-ANA), nuclear membrane, nuclear  
21  
22 dot and other defined patterns [10]. We previously reported that the H-ANA is the most  
23  
24 common among SLE patients from southern Sweden, but also the most common  
25  
26 amongst ANA positive healthy persons as well as in RA [8]. Antibodies against dsDNA,  
27  
28 histones and DNA/histone complex all yield an H-ANA pattern [11]. The presence of  
29  
30 anti-dsDNA, which is included in ACR-82 criterion number 10 designated 'immunologic  
31  
32 disorder', has been regarded as a fairly specific diagnostic marker of SLE and is very  
33  
34 common in lupus nephritis [2, 10–13]. S-ANA is generated by antibodies targeting  
35  
36 'extractable nuclear antigens' (ENA), *i.e.* a group of extra-chromosomal antigens which  
37  
38 are readily extracted with 0.15M sodium chloride, for instance 'small nuclear  
39  
40 ribonucleoprotein' (snRNP) and the 'Smith antigen' (Sm), which are both located on U1-  
41  
42 RNP particles [2, 10, 11]. Anti-Sm antibody detected by double radial immunodiffusion  
43  
44 (DRID) in gel is highly specific for SLE and practically always occurs together with anti-  
45  
46 snRNP. Anti-Sm has been reported to associate with constitutional symptoms (pyrexia,  
47  
48 weight-loss and fatigue), nephritis and central nervous system disease, but the  
49  
50 sensitivity in cohorts worldwide varies dramatically due to ethnicity [11, 14–16]. Anti-  
51  
52 Sm has also been reported to associate with serositis and Raynaud's phenomenon [17–  
53  
54  
55  
56  
57  
58  
59  
60

1  
2  
3 19]. N-ANA patterns are not typical of SLE, but rather of systemic sclerosis of the diffuse  
4 type [20]. N-ANA may be directed against *e.g.* fibrillarin, RNA-polymerase 1–3, ‘PM-Scl’,  
5 and Scl-70 (topoisomerase-1) [10, 11, 21]. Scl-70, which belongs to the ‘ENA family’, is  
6 also found both extra-chromosomally in the nucleoplasm and bound to DNA, thus giving  
7 rise to a mixed IF staining pattern. Like Scl-70, the SS-B/La antigen may partly localize in  
8 nucleoli. Most experience regarding clinical associations to anti-ENA refers to DRID  
9 analyses. As regards anti-SSB as well as anti-SSA, a positive DRID test is clinically linked  
10 to Sjögren’s syndrome and to some extent SLE [17, 22–26]. A positive anti-SSB/DRID  
11 test generally occurs together with anti-SSA, whereas anti-SSA is frequently  
12 demonstrated in the absence of anti-SSB. Since the concentration of SS-A is low in HEp-2  
13 cells, anti-SSA escapes detection when non-transfected HEp-2 cells are used as ANA  
14 substrate for IF microscopy [27]. In a small proportion of pregnant women with  
15 circulating anti-SSA/Ro52, transplacental antibody passage to the fetus can result in  
16 neonatal lupus, *i.e.* typical congenital skin rash (which vanishes in parallel with  
17 elimination of the maternal antibodies) and sometimes also in congenital lifelong  
18 complete atrioventricular heart block [28, 29].

19  
20  
21  
22  
23  
24  
25  
26  
27  
28  
29  
30  
31  
32  
33  
34  
35  
36  
37  
38  
39  
40  
41  
42 Although several studies have dealt with the clinical significance of ANA fine-specificities  
43 in SLE, very few have evaluated if/how different IF-ANA staining patterns may relate to  
44 distinct clinical lupus features. In the present study we aimed at comparing IF-ANA  
45 staining patterns with defined clinical and laboratory disease manifestations among  
46 well-characterized cases of SLE.  
47  
48  
49  
50  
51  
52  
53  
54  
55  
56  
57  
58  
59  
60



## PATIENTS AND METHODS

### Subjects

222 SLE patients (198 women and 24 men; mean age 51 years; range 18–88) taking part in the prospective follow-up programme KLURING (a Swedish acronym for ‘Clinical LUpus Register in Northeastern Gothia’) at the Rheumatology clinic, Linköping university hospital, Sweden were included between September 2008 and November 2012. This corresponds to about 95% of the expected SLE cases in the catchment area of Linköping and  $\geq 98\%$  of all known SLE cases. The patient material was recently described in detail [30]. 178 patients (80%) met the ACR-82 criteria [3], and 44 (20%) had a clinical diagnosis of SLE based on a history of abnormal ANA titer (specified below), and at least 2 typical organ manifestations at the time of diagnosis (referred to as the Fries’ criteria) [31, 32]. Patients were consecutively recruited; most were prevalent cases (85%), but some (15%) had newly diagnosed SLE at the time of enrollment. Distribution of age at disease onset is demonstrated in Figure 1. The median disease duration by year 2012 was 12 years (mean 13.4; range 0–49). Disease severity/organ damage was estimated using the SLICC/ACR damage index (SDI) at the end of year 2011 or from the last observation made [33]. 206 (93%) of the patients were Caucasians. 92 (41%) of the patients were prescribed antimalarials (AM) alone, 68 (31%) other disease-modifying anti-rheumatic drugs  $\pm$  AM and 128 (58%) oral glucocorticoids. IF-ANA staining patterns, anti-ENA reactivity and dsDNA antibodies were analyzed on a routine basis at the Clinical immunology laboratory, Linköping university hospital and were extracted from medical records. In many patients IF-ANA analysis was performed at several occasions over time, but discrepant staining patterns

1  
2  
3 were achieved in less than 5% of these cases. Herein, IF-ANA staining pattern from the  
4  
5 time-point most adjacent to SLE diagnosis was used for comparisons with clinical and  
6  
7 laboratory features.  
8  
9

### 10 11 12 **Indirect IF microscopy**

13  
14 ANA was analyzed by indirect IF microscopy using multispot slides with fixed HEp-2  
15  
16 cells (ImmunoConcepts, Sacramento, CA, USA) as antigen substrate and fluorescein-  
17  
18 isothiocyanate (FITC) conjugated gamma-chain specific anti-human IgG as detection  
19  
20 antibody (DAKO, Glostrup, Denmark). The cut-off level for a positive ANA test was set at  
21  
22 a titer of 1:200, corresponding to >95<sup>th</sup> percentile among 150 healthy female blood  
23  
24 donors. Positive ANA tests were categorized regarding IF staining patterns (H-ANA, S-  
25  
26 ANA, HS-ANA, N-ANA ± other pattern, or other staining patterns [here designated  
27  
28 oANA]). To qualify as an H-ANA pattern, chromatin staining was required in  
29  
30 metaphase/anaphase cells and, likewise, absence of chromatin staining was required to  
31  
32 qualify as a pure S-ANA pattern. Microscope slides with fixed *Crithidia luciliae*  
33  
34 (ImmunoConcepts) were used to analyze IgG-class anti-dsDNA antibodies by IF with a  
35  
36 cut-off titer at 1:10, corresponding to >99<sup>th</sup> percentile among 100 healthy blood donors.  
37  
38  
39  
40  
41  
42  
43  
44  
45

### 46 47 **Anti-ENA antibodies**

48  
49 Autoantibodies to ENA included the following specificities: SSA, SSB, Sm, snRNP, Scl-70  
50  
51 and Jo-1, and were analyzed by DRID (ImmunoConcepts) and/or line-blot technique  
52  
53 (ProfilePlus, R052 Euroassay, Euroimmun, Lübeck, Germany). In the case line-blot  
54  
55 screening resulted in positive reactions regarding antibodies against Sm, Jo-1 or Scl-70,  
56  
57 these specificities were confirmed by DRID in order to qualify as positive. For the other  
58  
59  
60

1  
2  
3 anti-ENA specificities, good reproducibility has been reassured at the performing  
4  
5 laboratory.  
6  
7  
8  
9

### 10 11 **Routine laboratory analyses** 12

13  
14 To assess hematologic and renal disorders, laboratory tests at selected visits included  
15 hemoglobin and blood cell counts (erythrocytes, total leukocyte count, lymphocytes,  
16 neutrophils and platelets) as well as urinalysis (dip-slide procedure for erythrocytes,  
17 protein and glucose), urinary sediment assessment and serum creatinine. Lupus  
18 anticoagulant was performed by the dilute Russell's viper venom test (DRVVT).  
19  
20  
21  
22  
23  
24  
25  
26  
27  
28  
29

### 30 **Renal histopathology** 31

32 38 of the included patients (*i.e.* 79% of those who fulfilled ACR-82 criterion number 7  
33 'renal disorder') had undergone renal biopsy performed by percutaneous  
34 ultrasonography-guided puncture in accordance with a standard protocol. The renal  
35 tissue obtained was classified according to the WHO classification for lupus nephritis  
36 [34]. All biopsies were evaluated by conventional light microscopy, direct IF and  
37 electron microscopy.  
38  
39  
40  
41  
42  
43  
44  
45  
46  
47  
48  
49

### 50 **Statistics** 51

52  
53 Frequencies of the different IF-ANA staining patterns in the study group were analyzed  
54 to identify subgroups for further analyses. Clinical and laboratory features were  
55 described by their frequencies, for each of most common pattern subgroups separately.  
56  
57  
58  
59  
60

1  
2  
3 Differences in distributions of different staining patterns regarding clinical and  
4  
5 laboratory features were analyzed using Chi-square tests of independence (alternatively  
6  
7 Fisher's exact test in case of small expected frequencies) with Cramer's V as measure of  
8  
9 effect size. All statistics were performed using IBM SPSS 20.0. *P*-values <0.05 were  
10  
11 considered significant.  
12  
13

### 14 15 16 17 18 **Ethical considerations** 19

20  
21 Oral and written informed consent was obtained from all subjects. The study protocol  
22  
23 was approved by the regional ethics committee in Linköping, Sweden (M75-08/2008).  
24  
25  
26  
27  
28  
29  
30  
31  
32  
33  
34  
35  
36  
37  
38  
39  
40  
41  
42  
43  
44  
45  
46  
47  
48  
49  
50  
51  
52  
53  
54  
55  
56  
57  
58  
59  
60

## RESULTS

Frequencies of clinical and laboratory features are displayed in Table 1ab. 219 of 222 (99%) were found to be ever ANA positive. Skin disease and arthritis were the most commonly fulfilled ACR-82 criteria followed by 'hematologic disorder'. 22% of the patients had renal disease and 44% showed positive anti-dsDNA antibody test at least once during their disease course. However, 5 individuals were classified with unknown or other pattern (oANA) since the Clinical immunology laboratory was unable to recover documentation of IF-ANA patterns or classified the positive nuclear staining pattern as very rare (nuclear dots). H-ANA staining was by far the most frequent pattern (54%) followed by S-ANA (22%), HS-ANA (11%), N-ANA ± other pattern (9%) and C-ANA (1%). The first 4 pattern groups were considered large enough for statistical comparisons.

Some clinical and laboratory features showed differences in proportions over different staining patterns (Table 1). 'Immunologic disorder' and anti-dsDNA antibodies were more often associated with H-ANA, and less often associated with S-ANA; whereas anti-snRNP showed the opposite direction (moderate to strong effects). Central nervous system disease was less often associated with H-ANA compared to other staining patterns, but the number of affected individuals was very low. Anti-Sm was more often, whereas arthritis and organ damage (SDI ≥1) respectively were less often, associated with S-ANA. Anti-SSA and anti-SSB antibodies were more often associated with HS-ANA.

Table 1a

| Clinical feature<br>(ACR-82) | H-ANA<br>(%) | S-ANA<br>(%) | HS-ANA<br>(%) | N-ANA*<br>(%) | P-value           | Cramer's V | C-ANA<br>(%) | oANA<br>(%) | Total (%) |
|------------------------------|--------------|--------------|---------------|---------------|-------------------|------------|--------------|-------------|-----------|
|                              | (n = 119)    | (n = 49)     | (n = 24)      | (n = 19)      |                   |            | (n = 3)      | (n = 5)     |           |
| Malar rash                   | 42.0         | 53.1         | 41.7          | 31.6          | 0.38              |            | 0            | 80          | 43.8      |
| Discoid lupus                | 12.6         | 18.4         | 20.8          | 10.5          | 0.57 <sup>†</sup> |            | 33           | 20          | 15.1      |
| Photosensitivity             | 47.9         | 65.3         | 58.3          | 36.8          | 0.09              |            | 33           | 80          | 52.5      |
| Oral ulcers                  | 10.1         | 16.3         | 12.5          | 10.5          | 0.68 <sup>†</sup> |            | 0            | 0           | 11.4      |
| Arthritis                    | 76.5         | 63.3 –       | 91.7          | 89.5          | 0.02              | 0.23       | 100          | 100         | 77.2      |
| Serositis                    | 42.9         | 38.8         | 25.0          | 47.4          | 0.38              |            | 100          | 20          | 40.6      |
| Pleuritis                    | 38.7         | 34.7         | 25.0          | 36.8          | 0.64              |            | 100          | 20          | 36.5      |
| Pericarditis                 | 16.0         | 14.3         | 0.0           | 15.8          | 0.15 <sup>†</sup> |            | 33           | 0           | 13.7      |
| Renal disorder               | 24.4         | 16.3         | 29.2          | 15.8          | 0.49              |            | 33           | 0           | 21.9      |
| Neurologic disorder          | 1.7 –        | 8.2          | 8.3           | 10.5          | 0.04 <sup>†</sup> | 0.17       | 33           | 0           | 5.0       |
| Seizures                     | 0.8 –        | 6.1          | 8.3           | 10.5          | 0.02 <sup>†</sup> | 0.19       | 33           | 0           | 4.1       |
| Psychosis                    | 0.8          | 2.0          | 0.0           | 5.3           | 0.22 <sup>†</sup> |            | 0            | 0           | 1.4       |
| Hematologic disorder         | 48.7         | 59.2         | 58.3          | 42.1          | 0.45              |            | 33           | 0           | 50.2      |
| Immunologic disorder         | 64.7 +       | 24.5 –       | 33.3          | 31.6          | <0.001            | 0.37       | 33           | 0           | 47.5      |
| Antinuclear antibody         | 100          | 100          | 100           | 100           |                   |            | 100          | 100         | 100       |
| ≥ 6 fulfilled ACR criteria   | 26.9         | 24.5         | 20.8          | 15.8          | 0.73              |            | 33           | 0           | 24.2      |
| SDI score ≥ 1                | 59.7         | 30.6 –       | 54.2          | 57.9          | 0.007             | 0.24       | 67           | 60          | 52.5      |

H = Homogenous. S = Speckled, HS = Homogenous/Speckled, N = Nucleolar, C = Centromeric, oANA = other pattern, + = positive association, – = negative association.

\* Staining pattern ± combination with other pattern(s).

<sup>†</sup> Fisher's exact test.

Table 1b

| Laboratory feature               | H-ANA (%) | S-ANA (%) | HS-ANA (%) | N-ANA*   | P-value             | Cramer's V | C-ANA (%) | oANA (%) | Total (%) |
|----------------------------------|-----------|-----------|------------|----------|---------------------|------------|-----------|----------|-----------|
|                                  | (n = 119) | (n = 49)  | (n = 24)   | (n = 19) |                     |            | (n = 3)   | (n = 5)  |           |
| Hemolytic anemia                 | 2.5       | 8.2       | 4.2        | 5.3      | 0.30 <sup>†</sup>   |            | 0         | 0        | 4.1       |
| Leukocytopenia                   | 29.4      | 30.6      | 33.3       | 21.1     | 0.84                |            | 33        | 0        | 28.8      |
| Lymphocytopenia                  | 27.7      | 32.7      | 33.3       | 31.6     | 0.90                |            | 0         | 0        | 28.8      |
| Thrombocytopenia                 | 10.1      | 16.3      | 12.5       | 5.3      | 0.59 <sup>†</sup>   |            | 0         | 0        | 11.0      |
| Lupus anticoagulant <sup>#</sup> | 34.6      | 24.3      | 33.3       | 38.5     | 0.68                |            | 33        | 50       | 32.5      |
| Anti-dsDNA                       | 63.9 +    | 12.2 –    | 33.3       | 26.3     | <0.001              | 0.45       | 33        | 0        | 43.8      |
| Anti-Sm                          | 3.4       | 16.7 +    | 4.2        | 10.5     | 0.022 <sup>†</sup>  | 0.21       | 0         | 0        | 7.0       |
| Anti-SSA/Ro                      | 32.8      | 43.8      | 62.5 +     | 36.8     | 0.047               | 0.20       | 33        | 0        | 38.5      |
| Anti-SSB/La                      | 7.0       | 12.8      | 33.3 +     | 0        | 0.002 <sup>†</sup>  | 0.29       | 0         | 0        | 11.8      |
| Anti-snRNP                       | 6.9 –     | 47.8 +    | 13.6       | 22.2     | <0.001 <sup>†</sup> | 0.43       | 0         | 0        | 20.2      |

H = Homogenous. S = Speckled, HS = Homogenous/Speckled, N = Nucleolar, C = Centromeric, oANA = other pattern, + = positive association, – = negative association.

\* Staining pattern ± combination with other pattern(s).

<sup>†</sup> Fisher's exact test.

<sup>#</sup> Not analyzed in all patients; H-ANA: n = 81, S-ANA: n = 37, HS-ANA: n = 18, N-ANA: n = 13, C-ANA: n = 3, oANA: n = 2.

1  
2  
3 Photosensitivity was significantly associated with anti-SSA antibodies (Figure 2). On the  
4  
5 contrary, arthritis was less common among patients with anti-SSA antibodies. A positive  
6  
7 anti-Sm antibody test was significantly associated with lymphocytopenia (Fisher's exact  
8  
9 test,  $p = 0.014$ , Cramer's  $V = 0.19$ ); and as expected, a positive anti-dsDNA antibody test  
10  
11 was significantly associated with renal disorder (Chi-square test,  $p < 0.001$ , Cramer's  $V$   
12  
13  $= 0.34$ ).  
14  
15  
16  
17  
18  
19

20 The proportions of different staining patterns in the group of patients fulfilling only the  
21  
22 Fries' criteria and those meeting the ACR-82 criteria are demonstrated in Figure 3. The  
23  
24 higher proportion of patients with nucleolar staining in the Fries' group as compared to  
25  
26 the ACR-82 group did not meet statistical significance (Fisher's exact test,  $p = 0.064$ ).  
27  
28 Figure 4 demonstrates the number of fulfilled ACR criteria in relation to nuclear staining  
29  
30 patterns. H-ANA was found to dominate regardless of the number of fulfilled ACR  
31  
32 criteria. As indicated in Figure 5, H-ANA was significantly more common in patients that  
33  
34 had been classified with proliferative lupus nephritis (WHO class 3 or 4) on renal biopsy  
35  
36 (Chi-square test,  $p < 0.001$ ) compared to other staining patterns.  
37  
38  
39  
40  
41  
42  
43  
44  
45  
46  
47  
48  
49  
50  
51  
52  
53  
54  
55  
56  
57  
58  
59  
60



## DISCUSSION

The use of IF microscopy to identify antinuclear antibodies was introduced by Holman, Kunkel and Friou already in the early 1950's [35, 36], and still remains the gold standard for ANA diagnostics [9, 37]. Different IF-ANA staining patterns arise depending on the nuclear antigens targeted and, to some extent, the nuclear staining patterns can have diagnostic implications [10, 11]. Furthermore, being an exceptionally heterogeneous disease entity, different SLE phenotypes may associate with different ANA subspecificities. Nevertheless, studies on IF-ANA staining patterns in relation to SLE subtypes are very scarce. Thus, herein we asked if the IF-ANA staining pattern of well-characterized SLE patients in a regional Swedish register *per se* contain any valuable clinical information.

In a previous investigation based on South Swedish SLE patients who had all been judged IF-ANA positive at the time-point of diagnosis, a considerable proportion (24%) lost their ANA positivity over time [8]. This may appear surprising, but our findings are very consistent with the results from a recent clinical trial for belimumab in SLE [38]. Our study demonstrated that, among those remaining IF-ANA positive over time, the vast majority (62%) displayed H-ANA  $\pm$  other pattern, whereas fewer had a pure S-ANA pattern (10%). In the present study, we confirmed that H-ANA is the most common IF-ANA pattern among Swedish SLE patients regardless of the number of fulfilled ACR criteria. The fact that we did not find any significant difference between ANA staining patterns in patients fulfilling the ACR-82 classification criteria and those that only met

1  
2  
3 Fries' criteria probably reflects that the ACR-82 criteria have a lower sensitivity and fail  
4  
5 to identify all patients with 'clinical SLE' and at least 2 typical organ manifestations.  
6  
7

8  
9  
10  
11 Many have dealt with differences in ANA fine-specificity and grouped patients according  
12  
13 to ANA seroprofiles in order to reveal potential associations with defined clinical lupus  
14  
15 manifestations [14–19, 22–26, 39, 40]. Using the luciferase immunoprecipitation system,  
16  
17 Ching *et al.* recently reported that the anti-Sm/snRNP-cluster was more associated with  
18  
19 serositis than with the anti-SSA/SSB cluster [19]. Thompson and colleagues observed  
20  
21 that SLE cases with anti-dsDNA and/or anti-Sm were more likely to have malar rash,  
22  
23 hypocomplementemia, renal and hematologic involvement than patients without these  
24  
25 autoantibodies [17]. Several studies have also concluded that anti-SSA positive patients  
26  
27 have an increased rate of lupus-related rash and photosensitivity [17, 22, 24]. Thus, our  
28  
29 finding of a significant association between anti-SSA and photosensitivity was expected.  
30  
31  
32  
33  
34  
35  
36  
37

38 In a recent and very large study from China, 1928 SLE patients from 5 different centers  
39  
40 were studied according to serological profiles [41]. The presence of anti-dsDNA was  
41  
42 found to be associated with renal disorder, serositis and hematological involvement. In  
43  
44 our study, anti-dsDNA was exclusively associated with renal disorder. Only 15% of the  
45  
46 Chinese lupus cohort exhibited the anti-Sm/snRNP/phospholipid-cluster, but these  
47  
48 patients had the highest frequency of malar rash, oral ulcers, arthritis and serositis [41].  
49  
50 As expected, skin disease/photosensitivity was associated with the anti-SSA/SSB cluster,  
51  
52 but contrasting to our findings Li *et al.* reported a positive association between anti-SSA  
53  
54 and arthritis. The reason for the contradictory findings may be sought in differences in  
55  
56 methodology as well as in genetic factors.  
57  
58  
59  
60

1  
2  
3  
4  
5  
6 Organ damage is strongly connected to SLE prognosis [42, 43], but only one biomarker  
7  
8 (osteopontin) has so far been shown to predict organ damage [44]. In the present study,  
9  
10 organ damage (SDI  $\geq 1$ ) was significantly less common among patients with S-ANA. This  
11  
12 is a novel finding which calls for confirmation by others. A plausible explanation is that  
13  
14 anti-dsDNA antibodies were also less common among cases with S-ANA and, given the  
15  
16 strong association between anti-dsDNA and lupus nephritis [13, 16], patients with S-  
17  
18 ANA may have less (or at least milder) renal disease with a subsequent risk of  
19  
20 developing organ damage. Another possible explanation is the well-documented  
21  
22 association between anti-SSA/SSB and milder disease manifestations, *e.g.* lupus-related  
23  
24 rash and photosensitivity [17, 22, 24]. Importantly, however, anti-SSA antibodies are not  
25  
26 visualized on standard HEp-2 cells (used in this study) since the antigen levels are low.  
27  
28  
29  
30  
31  
32  
33  
34

35 To conclude, the results of this study demonstrate that IF-ANA staining patterns have  
36  
37 some clinical correlates of potential diagnostic and prognostic interest in addition to  
38  
39 traditional antigen-specific immunoassays. The findings that arthritis and signs of organ  
40  
41 damage were less often associated with S-ANA compared to other staining patterns call  
42  
43 for confirmatory studies and further elaborations, including identification of ANA fine-  
44  
45 specificities.  
46  
47  
48  
49  
50  
51  
52  
53  
54  
55  
56  
57  
58  
59  
60

1  
2  
3 **Acknowledgements.** We thank research nurse Marianne Peterson and all the clinicians  
4  
5 for their efforts.  
6  
7

8  
9  
10  
11 **Contributors.** MF was involved in conception and design of the study, data collection  
12 and manuscript writing. ÖD contributed with statistical advice, interpretation of data  
13 and drafted the paper. AK was involved in acquisition of patient data, interpretation of  
14 data, intellectual discussion and manuscript writing. TS was involved in the laboratory  
15 work, interpretation of data, intellectual discussion and drafted the paper. CS  
16 contributed to the original idea, patient characterization, interpretation of data,  
17 intellectual discussion and manuscript writing.  
18  
19  
20  
21  
22  
23  
24  
25  
26  
27

28 **Funding.** The study was financed by grants from the Swedish Research Council, the  
29 County Council of Östergötland, the Swedish Society for Medical Research, the Swedish  
30 Rheumatism Association, the Swedish Society of Medicine, the Professor Nanna Svartz  
31 foundation, the King Gustaf V 80-year foundation, and the research foundation in  
32 memory of Ingrid Asp.  
33  
34  
35  
36  
37  
38  
39

40 **Competing interests.** None.  
41  
42

43 **Ethics approval.** The regional ethics committee in Linköping, Sweden.  
44  
45

46 **Data sharing.** No additional data are available.  
47  
48  
49  
50  
51  
52  
53  
54  
55  
56  
57  
58  
59  
60

## REFERENCES

1. Lateef A, Petri M. Unmet medical needs in systemic lupus erythematosus. *Arthritis Res Ther* 2012;14 Suppl. 4:S4
2. Rahman A, Isenberg DA. Systemic lupus erythematosus. *N Engl J Med* 2008;358:929–939.
3. Tan EM, Cohen AS, Fries JF, Masi AT, McShane DJ, Rothfield NF, *et al.* The 1982 revised criteria for the classification of systemic lupus erythematosus. *Arthritis Rheum* 1982;25:1271–1277.
4. Hochberg MC. Updating the American College of Rheumatology revised criteria for the classification of systemic lupus erythematosus. *Arthritis Rheum* 1997;40:1725.
5. Petri M, Orbai AM, Alarcón GS, Gordon C, Merrill JT, Fortin PR, *et al.* Derivation and validation of the Systemic Lupus International Collaborating Clinics classification criteria for systemic lupus erythematosus. *Arthritis Rheum* 2012;64:2677–2686.
6. Arnett FC, Edworthy SM, Bloch DA, McShane DJ, Fries JF, Cooper NS, *et al.* The American Rheumatism Association 1987 revised criteria for the classification of rheumatoid arthritis. *Arthritis Rheum* 1988;31:315–324.
7. Dahle C, Skogh T, Åberg AK, Jalal A, Olcén P. Methods of choice for diagnostic antinuclear antibody (ANA) screening: benefit of adding antigen-specific assays to immunofluorescence microscopy. *J Autoimmun* 2004;22:241–248.
8. Sjöwall C, Sturm M, Dahle C, Bengtsson AA, Jönsen A, Sturfelt G, Skogh T. Abnormal antinuclear antibody titers are less common than generally assumed in established cases of systemic lupus erythematosus. *J Rheumatol* 2008;35:1994–2000.
9. Solomon DH, Kavanaugh AJ, Schur PH, American College of Rheumatology Ad Hoc Committee on Immunologic Testing Guidelines. Evidence-based guidelines for the use of immunologic tests: antinuclear antibody testing. *Arthritis Rheum* 2002;47:434–444.
10. von Mühlen CA, Tan EM. Autoantibodies in the diagnosis of systemic lupus erythematosus. *Semin Arthritis Rheum* 1995;5:323–358
11. Fritzler MJ. Clinical relevance of autoantibodies in systemic rheumatic diseases. *Mol Biol Rep* 1996;23:133–145
12. ter Borg EJ, Horst G, Hummel EJ, Limburg PC, Kallenberg CG. Measurement of increases in anti-double-stranded DNA antibody levels as a predictor of disease

- 1  
2  
3 exacerbation in systemic lupus erythematosus: a long-term, prospective study.  
4 *Arthritis Rheum* 1990;33:634–643.  
5  
6  
7 13. Isenberg DA, Manson JJ, Ehrenstein MR, Rahman A. Fifty years of anti-ds DNA  
8 antibodies: are we approaching journey's end? *Rheumatology (Oxford)*  
9 2007;46:1052–1056.  
10  
11 14. Winfield JB, Brunner CM, Koffler D. Serologic studies in patients with systemic  
12 lupus erythematosus and central nervous system dysfunction. *Arthritis Rheum*  
13 1978;21:289–294.  
14  
15 15. Janwityanuchit S, Verasertniyom O, Vanichapuntu M, Vatanasuk M. Anti-Sm: its  
16 predictive value in systemic lupus erythematosus. *Clin Rheumatol* 1993;12:350–  
17 353.  
18  
19  
20 16. Alba P, Bento L, Cuadrado MJ, Karim Y, Tungekar MF, Abbs I, *et al.* Anti-dsDNA,  
21 anti-Sm antibodies and the lupus anticoagulant: significant factors associated  
22 with lupus nephritis. *Ann Rheum Dis* 2003;62:556–560.  
23  
24 17. Thompson D, Juby A, Davis P. The clinical significance of autoantibody profiles in  
25 patients with systemic lupus erythematosus. *Lupus* 1993;2:15–19.  
26  
27  
28 18. Hoffman IE, Peene I, Meheus L, Huizinga TW, Cebecauer L, Isenberg D, *et al.*  
29 Specific antinuclear antibodies are associated with clinical features in systemic  
30 lupus erythematosus. *Ann Rheum Dis* 2004;63:1155–1158.  
31  
32 19. Ching KH, Burbel PD, Tipton C, Wei C, Petri M, Sanz I, Iadarola MJ. Two major  
33 autoantibody clusters in systemic lupus erythematosus. *PLoS One*  
34 2012;7(2):e32001.  
35  
36  
37 20. Bunn CC, Denton CP, Shi-Wen X, Knight C, Black CM. Anti-RNA polymerases and  
38 other autoantibody specificities in systemic sclerosis. *Br J Rheumatol*  
39 1998;37:15–20.  
40  
41  
42 21. Brouwer R, Vree Egberts WT, Hengstman GJ, Raijmakers R, van Engelen BG,  
43 Seelig HP, *et al.* Autoantibodies directed to novel components of the PM/Scl  
44 complex, the human exosome. *Arthritis Res* 2002;4:134–138.  
45  
46 22. Sontheimer RD, Maddison PJ, Reichlin M, Jordon RE, Stastny P, Gilliam JN.  
47 Serologic and HLA associations in subacute cutaneous lupus erythematosus, a  
48 clinical subset of lupus erythematosus. *Ann Intern Med* 1982;97:664–671.  
49  
50 23. Anderson MJ, Peebles CL, McMillan R, Curd JG. Fluorescent antinuclear antibodies  
51 and anti-SSA/Ro in patients with immune thrombocytopenia subsequently  
52 developing systemic lupus erythematosus. *Ann Intern Med* 1985;103:548–550.  
53  
54  
55 24. Mond CB, Peterson MG, Rothfield NF. Correlation of anti-Ro antibody with  
56 photosensitivity rash in systemic lupus erythematosus patients. *Arthritis Rheum*  
57 1989;32:202–204.  
58  
59  
60

- 1  
2  
3 25. Baer AN, Maynard JW, Shaikh F, Magder LS, Petri M. Secondary Sjögren's  
4 syndrome in systemic lupus erythematosus defines a distinct disease subset. *J*  
5 *Rheumatol* 2010;37:1143–1149.  
6  
7 26. Franceschini F, Cavazzana I. Anti-Ro/SSA and La/SSB antibodies. *Autoimmunity*  
8 2005;38:55–63.  
9  
10 27. Fritzler MJ, Hanson C, Miller J, Eystathioy T. Specificity of autoantibodies to SS-  
11 A/Ro on a transfected and overexpressed human 60 kDa Ro autoantigen  
12 substrate. *J Clin Lab Anal* 2002;16:103–108.  
13  
14 28. Buyon JP, Clancy RM. Maternal autoantibodies and congenital heart block:  
15 mediators, markers, and therapeutic approach. *Semin Arthritis Rheum*  
16 2003;33:140–154.  
17  
18 29. Oke V, Wahren-Herlenius M. The immunobiology of Ro52 (TRIM21) in  
19 autoimmunity: a critical review. *J Autoimmun* 2012;39:77–82.  
20  
21 30. Enocsson H, Wetterö J, Skogh T, Sjöwall C. Soluble urokinase plasminogen  
22 activator receptor levels reflect organ damage in systemic lupus erythematosus.  
23 *Transl Res* 2013 (in press). doi: 10.1016/j.trsl.2013.07.003  
24  
25 31. Fries JF, Holman HR. Systemic lupus erythematosus: A clinical analysis. In: Smith  
26 LH, ed. *Major Problems in Internal Medicine*. Philadelphia, London, Toronto W.B.  
27 Saunders; 1975:8–20.  
28  
29 32. Fries JF. Methodology of validation of criteria for SLE. *Scand J Rheumatol Suppl.*  
30 1987;65:25–30.  
31  
32 33. Gladman D, Ginzler E, Goldsmith C, Fortin P, Ginzler E, Gordon C, *et al*. The  
33 development and initial validation of the Systemic Lupus International  
34 Collaborating Clinics/American College of Rheumatology damage index for  
35 systemic lupus erythematosus. *Arthritis Rheum* 1996;39:363–369.  
36  
37 34. Churg J, Bernstein J, Glassock RJ: *Renal Disease: Classification and Atlas of*  
38 *Glomerular Diseases* 2nd edition. New York: Igaku-Shoin; 1995.  
39  
40 35. Holman HR, Kunkel HG. Affinity between the lupus erythematosus serum factor  
41 and cell nuclei and nucleoprotein. *Science* 1957;126:162–163.  
42  
43 36. Friou GJ. Antinuclear antibodies: diagnostic significance and methods. *Arthritis*  
44 *Rheum* 1967;10:151–159.  
45  
46 37. Meroni PL, Schur PH. ANA screening: an old test with new recommendations. *Ann*  
47 *Rheum Dis* 2010;69:1420–1422.  
48  
49 38. Wallace DJ, Stohl W, Furie RA, Lisse JR, McKay JD, Merrill JT, *et al*. A phase II,  
50 randomized, double-blind, placebo-controlled, dose-ranging study of belimumab  
51 in patients with active systemic lupus erythematosus. *Arthritis Rheum*  
52 2009;61:1168–1178.  
53  
54  
55  
56  
57  
58  
59  
60



- 1  
2  
3  
4 39. Hochberg MC, Boyd RE, Ahearn JM, Arnett FC, Bias WB, Provost TT, Stevens MB.  
5 Systemic lupus erythematosus: A review of clinico-laboratory features and  
6 immunogenetic markers in 150 patients with emphasis on demographic subsets.  
7 *Medicine (Baltimore)* 1985;64:285–295.  
8  
9  
10 40. To CH, Petri M. Is antibody clustering predictive of clinical subsets and damage in  
11 systemic lupus erythematosus? *Arthritis Rheum* 2005;52:4003–4010.  
12  
13 41. Li PH, Wong WH, Lee TL, Lau CS, Chan TM, Leung AM, *et al.* Relationship between  
14 autoantibody clustering and clinical subsets in SLE: cluster and association  
15 analyses in Hong Kong Chinese. *Rheumatology (Oxford)* 2013;52:337–345.  
16  
17 42. Stoll T, Seifert B, Isenberg DA. SLICC/ACR Damage Index is valid, and renal and  
18 pulmonary organ scores are predictors of severe outcome in patients with  
19 systemic lupus erythematosus. *Br J Rheumatol* 1996;35:248–254.  
20  
21 43. Rahman P, Gladman DD, Urowitz MB, Hallett D, Tam LS. Early damage as  
22 measured by the SLICC/ACR damage index is a predictor of mortality in systemic  
23 lupus erythematosus. *Lupus* 2001;10:93–96.  
24  
25 44. Rullo OJ, Woo JM, Parsa MF, Hoftman AD, Maranian P, Elashoff DA, *et al.* Plasma  
26 levels of osteopontin identify patients at risk for organ damage in systemic lupus  
27 erythematosus. *Arthritis Res Ther* 2013;15:R18.  
28  
29  
30  
31  
32  
33  
34  
35  
36  
37  
38  
39  
40  
41  
42  
43  
44  
45  
46  
47  
48  
49  
50  
51  
52  
53  
54  
55  
56  
57  
58  
59  
60



## FIGURE LEGENDS

**Figure 1:** Percent of SLE patients by sex and decade of age at disease onset.

**Figure 2:** Percentage of patients fulfilling ACR-82 criterion 3 (photosensitivity) and 5 (arthritis) in relation to anti-SSA antibody status. Photosensitivity was significantly more common, and arthritis less common, in anti-SSA antibody positive SLE patients. Data on anti-SSA antibody status was available in 216 of 222 (97.3%) cases.

**Figure 3:** IF-ANA staining patterns demonstrated for the 219 ever ANA positive SLE patients divided on those who only met the Fries' criteria and those who fulfilled at least 4 out of the 11 ACR-82 criteria.

**Figure 4:** IF-ANA staining patterns demonstrated for the 219 ever ANA positive SLE patients divided on the number of fulfilled ACR-82 criteria.

**Figure 5:** IF-ANA staining patterns demonstrated for the 38 patients that had undergone renal biopsy divided according to the WHO classification for lupus nephritis.

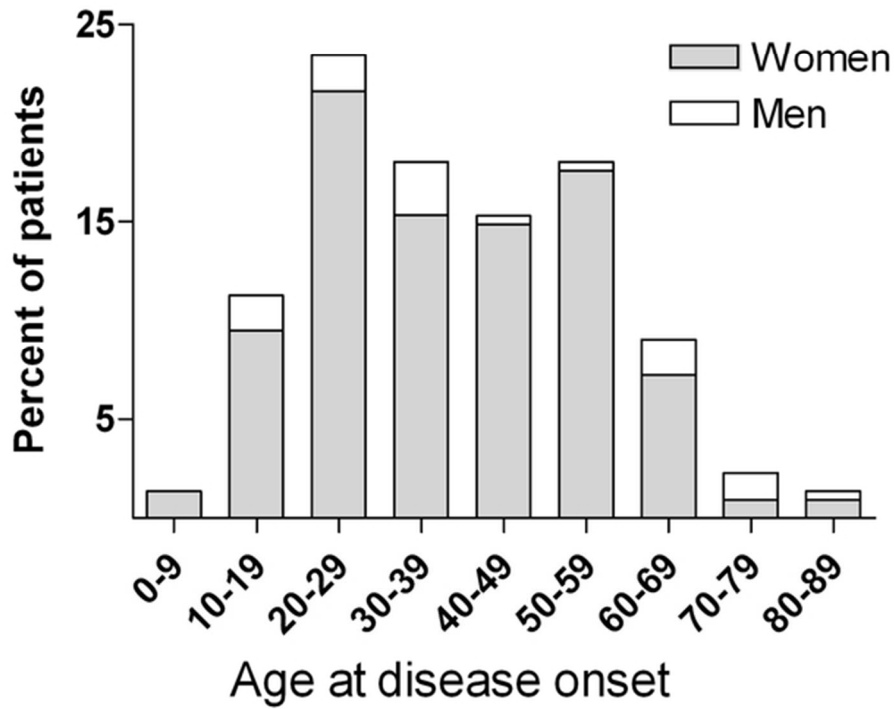

Figure 1: Percent of SLE patients by sex and decade of age at disease onset.  
57x45mm (300 x 300 DPI)

Peer Review Only

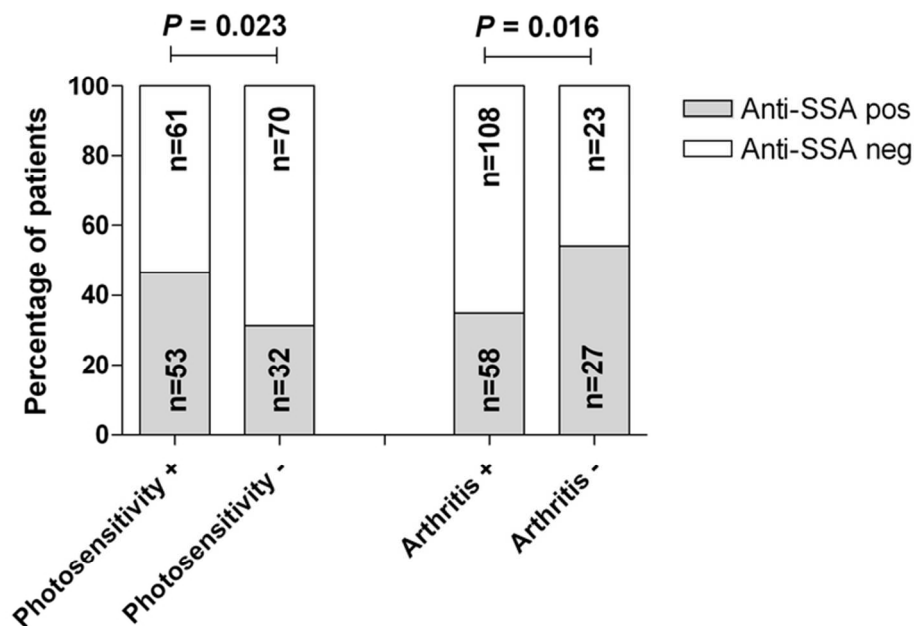

Figure 2: Percentage of patients fulfilling ACR-82 criterion 3 (photosensitivity) and 5 (arthritis) in relation to anti-SSA antibody status. Photosensitivity was significantly more common, and arthritis less common, in anti-SSA antibody positive SLE patients. Data on anti-SSA antibody status was available in 216 of 222 (97.3%) cases.

71x48mm (300 x 300 DPI)

View only

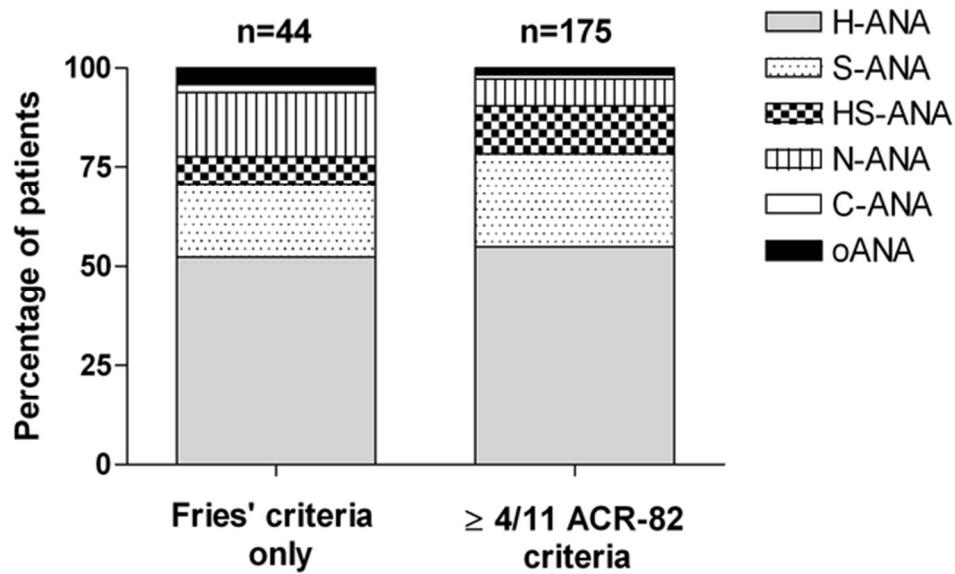

Figure 3: IF-ANA staining patterns demonstrated for the 219 ever ANA positive SLE patients divided on those who only met the Fries' criteria and those who fulfilled at least 4 out of the 11 ACR-82 criteria.  
57x36mm (300 x 300 DPI)

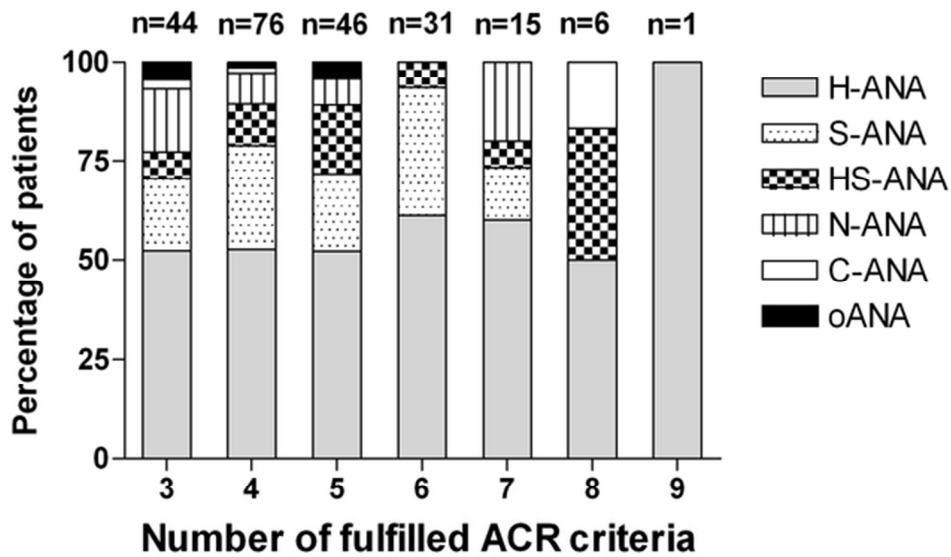

Figure 4: IF-ANA staining patterns demonstrated for the 219 ever ANA positive SLE patients divided on the number of fulfilled ACR-82 criteria.  
56x34mm (300 x 300 DPI)

Review only

1  
2  
3  
4  
5  
6  
7  
8  
9  
10  
11  
12  
13  
14  
15  
16  
17  
18  
19  
20  
21  
22  
23  
24  
25  
26  
27  
28  
29  
30  
31  
32  
33  
34  
35  
36  
37  
38  
39  
40  
41  
42  
43  
44  
45  
46  
47  
48  
49  
50  
51  
52  
53  
54  
55  
56  
57  
58  
59  
60

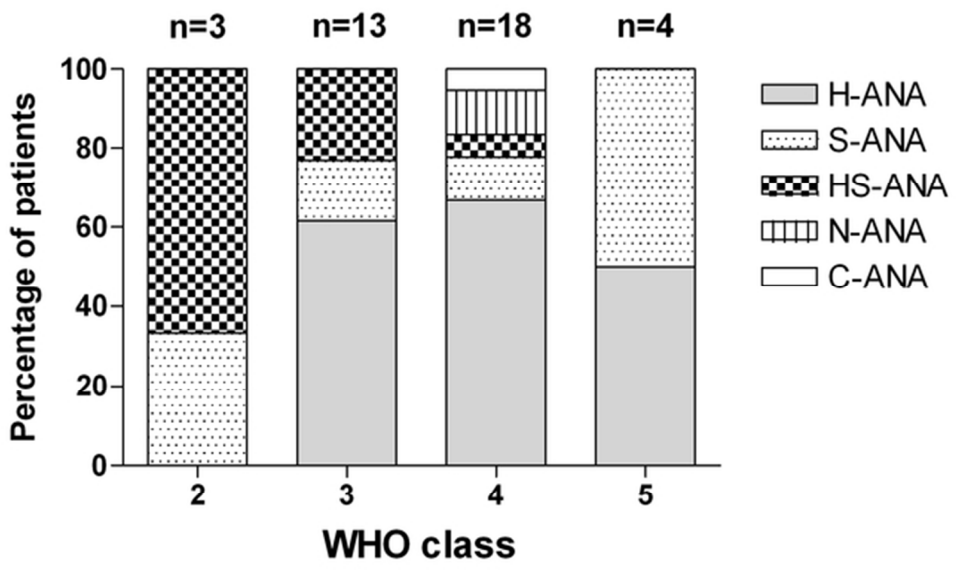

Figure 5: IF-ANA staining patterns demonstrated for the 38 patients that had undergone renal biopsy divided according to the WHO classification for lupus nephritis.  
57x35mm (300 x 300 DPI)

Review only

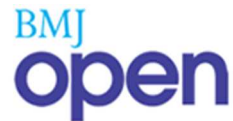

**Associations between antinuclear antibody staining patterns and clinical features of systemic lupus erythematosus: analysis of a regional Swedish register**

|                                 |                                                                                                                                                                                                                                                                                                                                                                                                              |
|---------------------------------|--------------------------------------------------------------------------------------------------------------------------------------------------------------------------------------------------------------------------------------------------------------------------------------------------------------------------------------------------------------------------------------------------------------|
| Journal:                        | <i>BMJ Open</i>                                                                                                                                                                                                                                                                                                                                                                                              |
| Manuscript ID:                  | bmjopen-2013-003608.R1                                                                                                                                                                                                                                                                                                                                                                                       |
| Article Type:                   | Research                                                                                                                                                                                                                                                                                                                                                                                                     |
| Date Submitted by the Author:   | 02-Sep-2013                                                                                                                                                                                                                                                                                                                                                                                                  |
| Complete List of Authors:       | Frodlund, Martina; IKE, Linköping university, AIR/Rheumatology<br>Dahlström, Örjan; Behavioural Sciences and Learning, Linköping University, Linneaus Centre HEAD, Swedish Institute for Disability Research<br>Kastbom, Alf; IKE, Linköping university, AIR/Rheumatology<br>Skogh, Thomas; IKE, Linköping university, AIR/Rheumatology<br>Sjöwall, Christopher; IKE, Linköping university, AIR/Rheumatology |
| <b>Primary Subject Heading</b>: | Rheumatology                                                                                                                                                                                                                                                                                                                                                                                                 |
| Secondary Subject Heading:      | Immunology (including allergy)                                                                                                                                                                                                                                                                                                                                                                               |
| Keywords:                       | Antinuclear antibodies, Immunofluorescence microscopy, Systemic lupus erythematosus, Organ damage, Ro/SSA                                                                                                                                                                                                                                                                                                    |
|                                 |                                                                                                                                                                                                                                                                                                                                                                                                              |

SCHOLARONE™  
Manuscripts

**TITLE PAGE**

**Manuscript title:** Associations between antinuclear antibody staining patterns and clinical features of systemic lupus erythematosus: analysis of a regional Swedish register

**Authors:** Martina Frodlund, MD<sup>1</sup>; Örjan Dahlström, PhD<sup>2</sup>; Alf Kastbom, MD PhD<sup>1</sup>; Thomas Skogh, MD PhD<sup>1</sup>; Christopher Sjöwall, MD PhD<sup>1\*</sup>

1. Rheumatology/AIR, Department of Clinical and Experimental Medicine, Linköping University, Linköping
2. Linneaus Centre HEAD, Swedish Institute for Disability Research, Department of Behavioural Sciences and Learning, Linköping University, Linköping, Sweden

**\* Corresponding author:**

Rheumatology Unit, University Hospital, SE-581 85 Linköping, Sweden

E-mail address: [christopher.sjowall@liu.se](mailto:christopher.sjowall@liu.se)

Telephone +46 10 1032416

Fax: +46 10 1031844

**Running head:** ANA staining patterns *versus* SLE phenotypes

**Keywords:** Antinuclear antibodies; Immunofluorescence microscopy; Systemic lupus erythematosus; Organ damage; Ro/SSA

**Word count:** 2993



**ABSTRACT**

**Objective.** Antinuclear antibody (ANA) analysis by immunofluorescence (IF) microscopy remains a diagnostic hallmark of systemic lupus erythematosus (SLE). The clinical relevance of ANA fine-specificities in SLE has been addressed repeatedly, whereas studies on IF-ANA staining patterns in relation to disease manifestations are very scarce. This study was done to elucidate whether different staining patterns associate with distinct SLE phenotypes.

**Design:** Observational cohort study.

**Setting:** One university hospital rheumatology unit in Sweden.

**Participants:** The study population consisted of 222 cases (89% women; 93% Caucasians), whereof 178 met  $\geq 4/11$  of the 1982 American College of Rheumatology criteria (ACR-82). The remaining 20% had an SLE diagnosis based on positive IF-ANA (HEp-2 cells) and  $\geq 2$  typical organ manifestations at the time of diagnosis (Fries' criteria).

**Outcome measures:** The IF-ANA staining patterns homogenous (H-ANA), speckled (S-ANA), combined H+S (HS-ANA), centromeric (C-ANA), nucleolar±other patterns (N-ANA), and other nuclear patterns (oANA) were related to disease manifestations and laboratory measures. Antigen-specificities were also considered regarding double-stranded DNA (*Crithidia luciliae*) and the following extractable nuclear antigens: Ro/SSA, La/SSB, Sm, snRNP, Scl-70 and Jo-1 (immunodiffusion and/or line-blot technique).

**Results:** 54% of the SLE patients displayed H-ANA, 22% S-ANA, 11% HS-ANA, 9% N-ANA, 1% C-ANA, 2% oANA and 1% were never ANA positive. Staining patterns among patients meeting Fries' criteria alone did not differ from those fulfilling ACR-82. H-ANA was significantly associated with the 10<sup>th</sup> criterion according to ACR-82 ('immunologic disorder'). S-ANA was inversely associated with arthritis, 'immunologic disorder' and signs of organ damage.

**Conclusions.** H-ANA is the dominant IF-ANA pattern among Swedish SLE patients, and was found to associate with 'immunologic disorder' according to ACR-82. The second most common pattern, S-ANA, associated negatively with arthritis and organ damage.

**ABSTRACT SUMMARY****Article focus:**

- The use of IF microscopy to identify ANA was introduced in the early 1950's, and this technique still remains the gold standard for ANA diagnostics when screening for autoimmune diseases such as SLE.
- Different IF-ANA staining patterns arise depending on the nuclear antigens targeted and, to some extent, the nuclear staining patterns can have diagnostic implications.
- Herein, we asked if the IF-ANA staining pattern of well-characterized SLE patients included in a regional Swedish register contain any valuable clinical information regarding distinct SLE phenotypes.

**Key messages:**

- Regardless of the number of fulfilled ACR-82 criteria, H-ANA was the most common IF-ANA pattern among Swedish SLE patients; and this staining was strongly associated with 'immunologic disorder' and anti-dsDNA antibodies.
- S-ANA was the second most common pattern and associated negatively with arthritis and organ damage. These intriguing findings are novel and need to be replicated.
- As previously shown by others, photosensitivity was significantly associated with anti-Ro/SSA antibodies. On the contrary, arthritis was less common among patients with anti-Ro/SSA antibodies.

**Strengths and limitations of this study:**

- The large study population with thoroughly organized data and very few internal missing values constitute the strength of this study.

- 1  
2  
3  
4  
5  
6  
7  
8  
9  
10  
11  
12  
13  
14  
15  
16  
17  
18  
19  
20  
21  
22  
23  
24  
25  
26  
27  
28  
29  
30  
31  
32  
33  
34  
35  
36  
37  
38  
39  
40  
41  
42  
43  
44  
45  
46  
47  
48  
49  
50  
51  
52  
53  
54  
55  
56  
57  
58  
59  
60
- Although this study confirmed several known associations between serological findings and clinical features, it did not have the power to allow comparisons with specific types of cutaneous lupus, renal disease, central or peripheral nervous system manifestations, as well as with clinical features not included in the ACR criteria.

For peer review only

## INTRODUCTION

The clinical spectrum of systemic lupus erythematosus (SLE) is exceedingly variable with an unpredictable disease course characteristically with episodes of flares and remissions. Ongoing disease exacerbations and cumulative damage/dysfunction over time can significantly interfere with quality of life [1]. Organ systems most commonly involved in SLE include joints, skin, mucous membranes, bone marrow, and kidneys. Despite the considerable differences between SLE patients, the occurrence of antinuclear antibodies (ANA) in serum at the time of diagnosis is a common finding with very few exceptions [2].

An “abnormal titer” of ANA assessed by immunofluorescence (IF) microscopy (IF-ANA) is one of the 11 criteria for SLE according to the 1982 American College of Rheumatology (ACR-82) validated classification criteria [3] as well as the 1997 revised criteria [4]. Also the recently proposed Systemic Lupus International Collaborating Clinics (SLICC) criteria state that an ANA test “above the laboratory reference value” remains a criterion for SLE, but without specifying the method for ANA assessment [5]. Unfortunately, none of the classification grounds state how to define the cut-off level for ANA. Similar to the definition of a positive rheumatoid factor test according to the 1987 ACR classification criteria for rheumatoid arthritis (RA) [6], we advocate a cut-off level of >95<sup>th</sup> percentile among healthy female blood donors to define an abnormal level of ANA analyzed by indirect IF microscopy utilizing fixed HEp-2 cells as source of nuclear antigens and, importantly, gamma-chain specific secondary antibodies to pinpoint IgG-class IF-ANA [7]. At this cut-off level, ANA has very high diagnostic sensitivity for SLE, but low diagnostic specificity, with close to 5% prevalence among healthy female blood

1  
2  
3 donors [8]. Accordingly, ANA testing should only be done upon fair clinical indications of  
4  
5 ANA-related disease. Although circulating levels of ANA may vary over time in SLE  
6  
7 patients, the correlation between IF-ANA titer and clinical activity is poor [9].  
8  
9

10  
11 Nuclear constituents such as histone proteins, double-stranded (ds) DNA, DNA/histone  
12  
13 complexes (nucleosomes), various nuclear enzymes and other  
14  
15 proteins/ribonucleoproteins are common target antigens for ANA. On the basis of their  
16  
17 different intra-nuclear distributions, IF-ANA staining patterns can be subdivided into  
18  
19 homogenous /chromosomal (H-ANA), centromeric (C-ANA),  
20  
21 speckled/extrachromosomal (S-ANA), nucleolar (N-ANA), nuclear membrane, nuclear  
22  
23 dot and other defined patterns [10]. The most common ANA pattern detected among  
24  
25 healthy individuals has been reported as a uniformly distributed staining of HEp-2 cells  
26  
27 in the interphase and a chromosomal staining in dividing cells, designated 'dense fine  
28  
29 speckled pattern', whereas we have actually referred to this staining as a  
30  
31 homogenous/chromosomal pattern, *i.e.* H-ANA [8, 11, 12]. A 'classical'  
32  
33 homogenous/chromosomal pattern is the most common among SLE patients from  
34  
35 southern Sweden as well as in RA [8]. Antibodies against dsDNA, histones and  
36  
37 DNA/histone complex all yield a 'classical' H-ANA pattern on HEp-2 cells [13].  
38  
39 Antibodies against dsDNA, histones and DNA/histone complex all yield an H-ANA  
40  
41 pattern [13]. The presence of anti-dsDNA, which is included in ACR-82 criterion number  
42  
43 10 designated 'immunologic disorder', has been regarded as a fairly specific diagnostic  
44  
45 marker of SLE and is very common in lupus nephritis [2, 10, 13–15]. S-ANA is generated  
46  
47 by antibodies targeting 'extractable nuclear antigens' (ENA), *i.e.* a group of extra-  
48  
49 chromosomal antigens which are readily extracted with 0.15M sodium chloride, for  
50  
51 instance 'small nuclear ribonucleoprotein' (snRNP) and the 'Smith antigen' (Sm), which  
52  
53  
54  
55  
56  
57  
58  
59  
60

1  
2  
3 are both located on U1-RNP particles [2, 10, 13]. Anti-Sm antibody detected by double  
4  
5 radial immunodiffusion (DRID) in gel is highly specific for SLE and practically always  
6  
7 occurs together with anti-snRNP. Anti-Sm has been reported to associate with  
8  
9 constitutional symptoms (pyrexia, weight-loss and fatigue), nephritis and central  
10  
11 nervous system disease, but the sensitivity in cohorts worldwide varies dramatically due  
12  
13 to ethnicity [13, 17–21]. Anti-Sm has also been reported to associate with serositis and  
14  
15 Raynaud's phenomenon [19, 22–24]. N-ANA patterns are not typical of SLE, but rather of  
16  
17 systemic sclerosis of the diffuse type [25]. N-ANA may be directed against *e.g.* fibrillarin,  
18  
19 RNA-polymerase 1–3, 'PM-Scl', and Scl-70 (topoisomerase-1) [10, 13, 26]. Scl-70, which  
20  
21 belongs to the 'ENA family', is also found both extra-chromosomally in the nucleoplasm  
22  
23 and bound to DNA, thus giving rise to a mixed IF staining pattern. Like Scl-70, the  
24  
25 La/SSB antigen may partly localize in nucleoli. Most experience regarding clinical  
26  
27 associations to anti-ENA refers to DRID analyses. As regards anti-La/SSB as well as anti-  
28  
29 Ro/SSA, a positive DRID test is clinically linked to Sjögren's syndrome and to some  
30  
31 extent SLE [22, 27–31]. A positive anti-La/SSB DRID test generally occurs together with  
32  
33 anti-Ro/SSA, whereas anti-Ro/SSA is frequently demonstrated in the absence of anti-  
34  
35 La/SSB. Since the concentration of Ro/SSA is low in HEp-2 cells, anti-Ro/SSA escapes  
36  
37 detection when non-transfected HEp-2 cells are used as ANA substrate for IF  
38  
39 microscopy [32]. In a small proportion of pregnant women with circulating anti-  
40  
41 Ro52/SSA, transplacental antibody passage to the fetus can result in neonatal lupus, *i.e.*  
42  
43 typical congenital skin rash (which vanishes in parallel with elimination of the maternal  
44  
45 antibodies) and sometimes also in congenital lifelong complete atrioventricular heart  
46  
47 block [33, 34].  
48  
49  
50  
51  
52  
53  
54  
55  
56  
57  
58  
59  
60

1  
2  
3 Although several studies have dealt with the clinical significance of ANA fine-specificities  
4  
5 in SLE, very few have evaluated if/how different IF-ANA staining patterns may relate to  
6  
7 distinct clinical lupus features. In the present study we aimed at comparing IF-ANA  
8  
9 staining patterns with defined clinical and laboratory disease manifestations among  
10  
11 well-characterized cases of SLE.  
12  
13  
14  
15  
16  
17  
18  
19  
20  
21  
22  
23  
24  
25  
26  
27  
28  
29  
30  
31  
32  
33  
34  
35  
36  
37  
38  
39  
40  
41  
42  
43  
44  
45  
46  
47  
48  
49  
50  
51  
52  
53  
54  
55  
56  
57  
58  
59  
60

For peer review only

## PATIENTS AND METHODS

### Subjects

222 SLE patients (198 women and 24 men; mean age 51 years; range 18–88) taking part in the prospective follow-up programme KLURING (a Swedish acronym for ‘Clinical LUpus Register in Northeastern Gothia’) at the Rheumatology clinic, Linköping university hospital, Sweden were included between September 2008 and November 2012. This corresponds to about 95% of the expected SLE cases in the catchment area of Linköping and  $\geq 98\%$  of all known SLE cases. The patient material was recently described in detail [35]. 178 patients (80%) met the ACR-82 criteria [3], and 44 (20%) had a clinical diagnosis of SLE based on a history of abnormal ANA titer (specified below), and at least 2 typical organ manifestations at the time of diagnosis (referred to as the Fries’ criteria) [36, 37]. The presence of anti-cardiolipin antibodies of IgG and/or IgM class detected by ELISA and/or positive lupus anticoagulant test (not classified as an immunologic criterion according to ACR-82) was found in 31 of the 44 individuals (70%) in the Fries group.

Patients were consecutively recruited; most were prevalent cases (85%), but some (15%) had newly diagnosed SLE at the time of enrollment. Distribution of age at disease onset is demonstrated in Figure 1. The median disease duration by year 2012 was 12 years (mean 13.4; range 0–49). Disease severity/organ damage was estimated using the SLICC/ACR damage index (SDI) at the end of year 2011 or from the last observation made [38]. 206 (93%) of the patients were Caucasians. 92 (41%) of the patients were prescribed antimalarials (AM) alone, 68 (31%) other disease-modifying anti-rheumatic



1  
2  
3 drugs  $\pm$  AM and 128 (58%) oral glucocorticoids. IF-ANA staining patterns, anti-ENA  
4  
5 reactivity and dsDNA antibodies were analyzed on a routine basis at the Clinical  
6  
7 immunology laboratory, Linköping university hospital and were extracted from medical  
8  
9 records. In many patients, IF-ANA analysis was performed at several occasions over  
10  
11 time but discrepant staining patterns were achieved in less than 5% of these cases.  
12  
13 Herein, IF-ANA staining pattern from the time-point most adjacent to SLE onset was  
14  
15 used for comparisons with clinical and laboratory features.  
16  
17  
18  
19  
20

### 21 **Indirect IF microscopy**

22  
23 ANA was analyzed by indirect IF microscopy using multispot slides with fixed HEp-2  
24  
25 cells (ImmunoConcepts, Sacramento, CA, USA) as antigen substrate and fluorescein-  
26  
27 isothiocyanate (FITC) conjugated gamma-chain specific anti-human IgG as detection  
28  
29 antibody (DAKO, Glostrup, Denmark). The cut-off level for a positive ANA test was set at  
30  
31 a titer of 1:200, corresponding to >95<sup>th</sup> percentile among 150 healthy female blood  
32  
33 donors. Positive ANA tests were categorized regarding IF staining patterns (H-ANA, S-  
34  
35 ANA, HS-ANA, N-ANA  $\pm$  other pattern, or other staining patterns [here designated  
36  
37 oANA]). To qualify as an H-ANA pattern, chromatin staining was required in  
38  
39 metaphase/anaphase cells and, likewise, absence of chromatin staining was required to  
40  
41 qualify as a pure S-ANA pattern. Microscope slides with fixed *Crithidia luciliae*  
42  
43 (ImmunoConcepts) and FITC conjugated gamma-chain specific anti-human IgG (DAKO)  
44  
45 were used to analyze IgG-class anti-dsDNA antibodies by IF with a cut-off titer at 1:10,  
46  
47 corresponding to >99<sup>th</sup> percentile among 100 (50 males/50 females) healthy blood  
48  
49 donors.  
50  
51  
52  
53  
54  
55  
56  
57  
58  
59  
60

### Anti-ENA antibodies

Autoantibodies to ENA included the following specificities: Ro/SSA, La/SSB, Sm, snRNP, Scl-70 and Jo-1, and were analyzed by DRID (ImmunoConcepts) and/or line-blot technique (ProfilePlus, R052 Euroassay, Euroimmun, Lübeck, Germany). In the case line-blot screening resulted in positive reactions regarding antibodies against Sm, Jo-1 or Scl-70, these specificities were confirmed by DRID in order to qualify as positive. For the other anti-ENA specificities, good reproducibility has been reassured at the performing laboratory.

### Routine laboratory analyses

To assess hematologic and renal disorders, laboratory tests at selected visits included hemoglobin and blood cell counts (erythrocytes, total leukocyte count, lymphocytes, neutrophils and platelets) as well as urinalysis (dip-slide procedure for erythrocytes, protein and glucose), urinary sediment assessment and serum creatinine. Lupus anticoagulant was performed by the dilute Russell's viper venom test (DRVVT).

### Renal histopathology

38 of the included patients (*i.e.* 79% of those who fulfilled ACR-82 criterion number 7 'renal disorder') had undergone renal biopsy performed by percutaneous ultrasonography-guided puncture in accordance with a standard protocol. The renal tissue obtained was classified according to the WHO classification for lupus nephritis [39]. All biopsies were evaluated by conventional light microscopy, direct IF and electron microscopy.

## Statistics

Frequencies of the different IF-ANA staining patterns in the study group were analyzed to identify subgroups for further analyses. Clinical and laboratory features were described by their frequencies, for each of most common pattern subgroups separately. Differences in distributions of different staining patterns regarding clinical and laboratory features were analyzed using Chi-square tests of independence (alternatively Fisher's exact test in case of small expected frequencies) with Cramer's V as measure of effect size. All statistics were performed using IBM SPSS 20.0. For each statistical test, exact *p*-values (non-adjusted) are reported.

## Ethical considerations

Oral and written informed consent was obtained from all subjects. The study protocol was approved by the regional ethics committee in Linköping, Sweden (M75-08/2008).

## RESULTS

Frequencies of clinical and laboratory features are displayed in Table 1ab. 219 of 222 (99%) were found to be ever ANA positive. Skin disease and arthritis were the most commonly fulfilled ACR-82 criteria followed by 'hematologic disorder'. 22% of the patients had renal disease and 44% showed positive anti-dsDNA antibody test at least once during their disease course. However, 5 individuals were classified with unknown or other pattern (oANA) since the Clinical immunology laboratory was unable to recover documentation of IF-ANA patterns or classified the positive nuclear staining pattern as very rare (nuclear dots). 4 of these 5 individuals were prescribed at least one disease-modifying drug. H-ANA staining was by far the most frequent pattern (54%) followed by S-ANA (22%), HS-ANA (11%), N-ANA ± other pattern (9%) and C-ANA (1%). The first 4 pattern groups were considered large enough for statistical comparisons.

Some clinical and laboratory features showed differences in proportions over different staining patterns (Table 1). 'Immunologic disorder' (the 10<sup>th</sup> ACR-82 criterion) and anti-dsDNA antibodies were more often associated with H-ANA, and less often associated with S-ANA; whereas anti-snRNP showed the opposite direction (moderate to strong effects). Central nervous system disease was less often associated with H-ANA compared to other staining patterns, but the number of affected individuals was very low. Anti-Sm was more often, whereas arthritis and organ damage (SDI ≥1) respectively were less often, associated with S-ANA. Anti-Ro/SSA and anti-La/SSB antibodies were more often associated with HS-ANA. No significant differences in proportions of the number of concomitant anti-nuclear antibody fine-specificities over different staining patterns

1  
2  
3 were recorded.  
4  
5  
6  
7  
8  
9  
10  
11  
12  
13  
14  
15  
16  
17  
18  
19  
20  
21  
22  
23  
24  
25  
26  
27  
28  
29  
30  
31  
32  
33  
34  
35  
36  
37  
38  
39  
40  
41  
42  
43  
44  
45  
46  
47  
48  
49  
50  
51  
52  
53  
54  
55  
56  
57  
58  
59  
60

For peer review only

Table 1a

| Clinical feature<br>(ACR-82) | H-ANA<br>(%) | S-ANA<br>(%) | HS-ANA<br>(%) | N-ANA*<br>(%) | P-value           | Cramer's V | C-ANA<br>(%) | oANA<br>(%) | Total (%) |
|------------------------------|--------------|--------------|---------------|---------------|-------------------|------------|--------------|-------------|-----------|
|                              | (n = 119)    | (n = 49)     | (n = 24)      | (n = 19)      |                   |            | (n = 3)      | (n = 5)     |           |
| Malar rash                   | 42.0         | 53.1         | 41.7          | 31.6          | 0.38              |            | 0            | 80          | 43.8      |
| Discoid lupus                | 12.6         | 18.4         | 20.8          | 10.5          | 0.57 <sup>†</sup> |            | 33           | 20          | 15.1      |
| Photosensitivity             | 47.9         | 65.3         | 58.3          | 36.8          | 0.09              |            | 33           | 80          | 52.5      |
| Oral ulcers                  | 10.1         | 16.3         | 12.5          | 10.5          | 0.68 <sup>†</sup> |            | 0            | 0           | 11.4      |
| Arthritis                    | 76.5         | 63.3 –       | 91.7          | 89.5          | 0.02              | 0.23       | 100          | 100         | 77.2      |
| Serositis                    | 42.9         | 38.8         | 25.0          | 47.4          | 0.38              |            | 100          | 20          | 40.6      |
| Pleuritis                    | 38.7         | 34.7         | 25.0          | 36.8          | 0.64              |            | 100          | 20          | 36.5      |
| Pericarditis                 | 16.0         | 14.3         | 0.0           | 15.8          | 0.15 <sup>†</sup> |            | 33           | 0           | 13.7      |
| Renal disorder               | 24.4         | 16.3         | 29.2          | 15.8          | 0.49              |            | 33           | 0           | 21.9      |
| Neurologic disorder          | 1.7 –        | 8.2          | 8.3           | 10.5          | 0.04 <sup>†</sup> | 0.17       | 33           | 0           | 5.0       |
| Seizures                     | 0.8 –        | 6.1          | 8.3           | 10.5          | 0.02 <sup>†</sup> | 0.19       | 33           | 0           | 4.1       |
| Psychosis                    | 0.8          | 2.0          | 0.0           | 5.3           | 0.22 <sup>†</sup> |            | 0            | 0           | 1.4       |
| Hematologic disorder         | 48.7         | 59.2         | 58.3          | 42.1          | 0.45              |            | 33           | 0           | 50.2      |
| Immunologic disorder         | 64.7 +       | 24.5 –       | 33.3          | 31.6          | <0.001            | 0.37       | 33           | 0           | 47.5      |
| Antinuclear antibody         | 100          | 100          | 100           | 100           |                   |            | 100          | 100         | 100       |
| ≥ 6 fulfilled ACR criteria   | 26.9         | 24.5         | 20.8          | 15.8          | 0.73              |            | 33           | 0           | 24.2      |
| SDI score ≥ 1                | 59.7         | 30.6 –       | 54.2          | 57.9          | 0.007             | 0.24       | 67           | 60          | 52.5      |

H = Homogenous. S = Speckled, HS = Homogenous/Speckled, N = Nucleolar, C = Centromeric, oANA = other pattern, + = positive association, – = negative association.

\* Staining pattern ± combination with other pattern(s).

† Fisher's exact test.

Table 1b

| Laboratory feature               | H-ANA (%) | S-ANA (%) | HS-ANA (%) | N-ANA* (%) | P-value             | Cramer's V | C-ANA (%) | oANA (%) | Total (%) |
|----------------------------------|-----------|-----------|------------|------------|---------------------|------------|-----------|----------|-----------|
|                                  | (n = 119) | (n = 49)  | (n = 24)   | (n = 19)   |                     |            | (n = 3)   | (n = 5)  |           |
| Hemolytic anemia                 | 2.5       | 8.2       | 4.2        | 5.3        | 0.30 <sup>†</sup>   |            | 0         | 0        | 4.1       |
| Leukocytopenia                   | 29.4      | 30.6      | 33.3       | 21.1       | 0.84                |            | 33        | 0        | 28.8      |
| Lymphocytopenia                  | 27.7      | 32.7      | 33.3       | 31.6       | 0.90                |            | 0         | 0        | 28.8      |
| Thrombocytopenia                 | 10.1      | 16.3      | 12.5       | 5.3        | 0.59 <sup>†</sup>   |            | 0         | 0        | 11.0      |
| Lupus anticoagulant <sup>#</sup> | 34.6      | 24.3      | 33.3       | 38.5       | 0.68                |            | 33        | 50       | 32.5      |
| Anti-dsDNA                       | 63.9 +    | 12.2 –    | 33.3       | 26.3       | <0.001              | 0.45       | 33        | 0        | 43.8      |
| Anti-Sm                          | 3.4       | 16.7 +    | 4.2        | 10.5       | 0.022 <sup>†</sup>  | 0.21       | 0         | 0        | 7.0       |
| Anti-Ro/SSA                      | 32.8      | 43.8      | 62.5 +     | 36.8       | 0.047               | 0.20       | 33        | 0        | 38.5      |
| Anti-La/SSB                      | 7.0       | 12.8      | 33.3 +     | 0          | 0.002 <sup>†</sup>  | 0.29       | 0         | 0        | 11.8      |
| Anti-snRNP                       | 6.9 –     | 47.8 +    | 13.6       | 22.2       | <0.001 <sup>†</sup> | 0.43       | 0         | 0        | 20.2      |

H = Homogenous. S = Speckled, HS = Homogenous/Speckled, N = Nucleolar, C = Centromeric, oANA = other pattern, + = positive association, – = negative association.

\* Staining pattern ± combination with other pattern(s).

<sup>†</sup> Fisher's exact test.

<sup>#</sup> Not analyzed in all patients; H-ANA: n = 81, S-ANA: n = 37, HS-ANA: n = 18, N-ANA: n = 13, C-ANA: n = 3, oANA: n = 2.

1  
2  
3 Photosensitivity was significantly associated with anti-Ro/SSA antibodies (Figure 2). On  
4  
5 the contrary, arthritis was less common among patients with anti-Ro/SSA antibodies. A  
6  
7 positive anti-Sm antibody test was significantly associated with lymphocytopenia  
8  
9 (Fisher's exact test,  $p = 0.014$ , Cramer's  $V = 0.19$ ); and as expected, a positive anti-dsDNA  
10  
11 antibody test was significantly associated with renal disorder (Chi-square test,  $p < 0.001$ ,  
12  
13 Cramer's  $V = 0.34$ ).  
14  
15

16  
17  
18  
19  
20 The proportions of different staining patterns in the group of patients fulfilling only the  
21  
22 Fries' criteria and those meeting the ACR-82 criteria are demonstrated in Figure 3. The  
23  
24 higher proportion of patients with nucleolar staining in the Fries' group as compared to  
25  
26 the ACR-82 group did not meet statistical significance (Fisher's exact test,  $p = 0.064$ ).  
27  
28 Figure 4 demonstrates the number of fulfilled ACR criteria in relation to nuclear staining  
29  
30 patterns. H-ANA was found to dominate regardless of the number of fulfilled ACR  
31  
32 criteria. As indicated in Figure 5, H-ANA was significantly more common in patients that  
33  
34 had been classified with proliferative lupus nephritis (WHO class 3 or 4) on renal biopsy  
35  
36 (Chi-square test,  $p < 0.001$ ) compared to other staining patterns.  
37  
38  
39  
40  
41  
42  
43  
44  
45  
46  
47  
48  
49  
50  
51  
52  
53  
54  
55  
56  
57  
58  
59  
60



## DISCUSSION

The use of IF microscopy to identify antinuclear antibodies was introduced by Holman, Kunkel and Friou already in the early 1950's [40, 41], and still remains the gold standard for ANA diagnostics [9, 42]. Different IF-ANA staining patterns arise depending on the nuclear antigens targeted and, to some extent, the nuclear staining patterns can have diagnostic implications [10, 13]. Being an exceptionally heterogeneous disease entity, different SLE phenotypes may associate with different ANA subspecificities.

Nevertheless, studies on IF-ANA staining patterns in relation to SLE subtypes are very scarce. Thus, herein we asked if the IF-ANA staining pattern of well-characterized SLE patients in a regional Swedish register *per se* contain any valuable clinical information. No corrections for multiple comparisons were made, but by reporting the exact *p*-values this can easily be done with a preferred method [43].

In a previous investigation based on South Swedish SLE patients who had all been judged IF-ANA positive at the time-point of diagnosis, a considerable proportion (24%) lost their ANA positivity over time [8]. This may appear surprising, but our findings are very consistent with the results from a recent clinical trial for belimumab in SLE [44]. Our study demonstrated that, among those remaining IF-ANA positive over time, the vast majority (62%) displayed H-ANA ± other pattern, whereas fewer had a pure S-ANA pattern (10%). In the present study, we confirmed that H-ANA is the most common IF-ANA pattern among Swedish SLE patients regardless of the number of fulfilled ACR criteria. The fact that we did not find any significant difference between ANA staining patterns in patients fulfilling the ACR-82 classification criteria and those that only met

1  
2  
3 Fries' criteria probably reflects that the ACR-82 criteria have a lower sensitivity and fail  
4  
5 to identify all patients with 'clinical SLE' and at least 2 typical organ manifestations.  
6  
7

8  
9  
10  
11 Many have dealt with differences in ANA fine-specificity and grouped patients according  
12  
13 to ANA seroprofiles in order to reveal potential associations with defined clinical lupus  
14  
15 manifestations [17–20, 22–24, 27–31, 45, 46]. Using the luciferase immunoprecipitation  
16  
17 system, Ching *et al.* recently reported that the anti-Sm/snRNP-cluster was more  
18  
19 associated with serositis than with the anti-SSA/SSB cluster [24]. Thompson and  
20  
21 colleagues observed that SLE cases with anti-dsDNA and/or anti-Sm were more likely to  
22  
23 have malar rash, hypocomplementemia, renal and hematologic involvement than  
24  
25 patients without these autoantibodies [22]. Our finding of a significant association  
26  
27 between anti-Ro/SSA and photosensitivity was expected since several studies reported  
28  
29 that anti-Ro/SSA positive patients have an increased rate of lupus-related rash and  
30  
31 photosensitivity [22, 27, 29]. However, in other studies the correlation between anti-  
32  
33 Ro/SSA and skin disease has been less clear [19, 47–49].  
34  
35  
36  
37  
38  
39  
40  
41

42 In a recent and very large study from China, 1928 SLE patients from 5 different centers  
43  
44 were studied according to serological profiles [50]. The presence of anti-dsDNA was  
45  
46 found to be associated with renal disorder, serositis and hematological involvement. In  
47  
48 our study, anti-dsDNA was exclusively associated with renal disorder. Only 15% of the  
49  
50 Chinese lupus cohort exhibited the anti-Sm/snRNP/phospholipid-cluster, but these  
51  
52 patients had the highest frequency of malar rash, oral ulcers, arthritis and serositis [50].  
53  
54 As expected, skin disease/photosensitivity was associated with the anti-SSA/SSB cluster,  
55  
56 but contrasting to our findings Li *et al.* reported a positive association between anti-SSA  
57  
58  
59  
60

1  
2  
3 and arthritis. The reason for the contradictory findings may be sought in differences in  
4  
5 methodology as well as in genetic factors.  
6  
7  
8  
9

10  
11 Organ damage is strongly connected to SLE prognosis [51, 52], but only one biomarker  
12 (osteopontin) has so far been shown to predict organ damage [53]. In the present study,  
13 organ damage (SDI  $\geq 1$ ) was significantly less common among patients with S-ANA. This  
14 is a novel finding which calls for confirmation by others. A plausible explanation is that  
15 anti-dsDNA antibodies were also less common among cases with S-ANA and, given the  
16 strong association between anti-dsDNA and lupus nephritis [15, 16, 20], patients with S-  
17 ANA may have less (or at least milder) renal disease with a subsequent risk of  
18 developing organ damage. Another possible explanation is the well-documented  
19 association between anti-SSA/SSB and milder disease manifestations, *e.g.* lupus-related  
20 rash and photosensitivity [22, 27, 29]. Importantly, however, anti-SSA antibodies are not  
21 visualized on standard HEp-2 cells (used in this study) since the antigen levels are low.  
22  
23  
24  
25  
26  
27  
28  
29  
30  
31  
32  
33  
34  
35  
36  
37  
38  
39

40 To conclude, the results of this study demonstrate that IF-ANA staining patterns have  
41 some clinical correlates of potential diagnostic and prognostic interest in addition to  
42 traditional antigen-specific immunoassays. The findings that arthritis and signs of organ  
43 damage were less often associated with S-ANA compared to other staining patterns call  
44 for confirmatory studies and further elaborations, including identification of ANA fine-  
45 specificities.  
46  
47  
48  
49  
50  
51  
52  
53  
54  
55  
56  
57  
58  
59  
60

1  
2  
3 **Acknowledgements.** We thank research nurse Marianne Peterson and all the clinicians  
4  
5 for their efforts.  
6  
7  
8  
9

10  
11 **Contributors.** MF was involved in conception and design of the study, data collection  
12 and manuscript writing. ÖD contributed with statistical advice, interpretation of data  
13 and drafted the paper. AK was involved in acquisition of patient data, interpretation of  
14 data, intellectual discussion and manuscript writing. TS was involved in the laboratory  
15 work, interpretation of data, intellectual discussion and drafted the paper. CS  
16 contributed to the original idea, patient characterization, interpretation of data,  
17 intellectual discussion and manuscript writing.  
18  
19  
20  
21  
22  
23  
24  
25  
26  
27  
28  
29  
30

31 **Funding.** The study was financed by grants from the Swedish Research Council, the  
32 County Council of Östergötland, the Swedish Society for Medical Research, the Swedish  
33 Rheumatism Association, the Swedish Society of Medicine, the Professor Nanna Svartz  
34 foundation, the King Gustaf V 80-year foundation, and the research foundation in  
35 memory of Ingrid Asp.  
36  
37  
38  
39  
40  
41  
42  
43  
44  
45

46 **Competing interests.** None.  
47  
48  
49  
50  
51

52 **Ethics approval.** The regional ethics committee in Linköping, Sweden.  
53  
54  
55  
56  
57  
58  
59  
60

## REFERENCES

1. Lateef A, Petri M. Unmet medical needs in systemic lupus erythematosus. *Arthritis Res Ther* 2012;14 Suppl. 4:S4
2. Rahman A, Isenberg DA. Systemic lupus erythematosus. *N Engl J Med* 2008;358:929–939.
3. Tan EM, Cohen AS, Fries JF, *et al.* The 1982 revised criteria for the classification of systemic lupus erythematosus. *Arthritis Rheum* 1982;25:1271–1277.
4. Hochberg MC. Updating the American College of Rheumatology revised criteria for the classification of systemic lupus erythematosus. *Arthritis Rheum* 1997;40:1725.
5. Petri M, Orbai AM, Alarcón GS, *et al.* Derivation and validation of the Systemic Lupus International Collaborating Clinics classification criteria for systemic lupus erythematosus. *Arthritis Rheum* 2012;64:2677–2686.
6. Arnett FC, Edworthy SM, Bloch DA, *et al.* The American Rheumatism Association 1987 revised criteria for the classification of rheumatoid arthritis. *Arthritis Rheum* 1988;31:315–324.
7. Dahle C, Skogh T, Åberg AK, *et al.* Methods of choice for diagnostic antinuclear antibody (ANA) screening: benefit of adding antigen-specific assays to immunofluorescence microscopy. *J Autoimmun* 2004;22:241–248.
8. Sjöwall C, Sturm M, Dahle C, *et al.* Abnormal antinuclear antibody titers are less common than generally assumed in established cases of systemic lupus erythematosus. *J Rheumatol* 2008;35:1994–2000.
9. Solomon DH, Kavanaugh AJ, Schur PH, *et al.* Evidence-based guidelines for the use of immunologic tests: antinuclear antibody testing. *Arthritis Rheum* 2002;47:434–444.
10. von Mühlen CA, Tan EM. Autoantibodies in the diagnosis of systemic lupus erythematosus. *Semin Arthritis Rheum* 1995;5:323–358
11. Mariz HA, Sato EI, Barbosa SH, *et al.* Pattern on the antinuclear antibody-HEp-2 test is a critical parameter for discriminating antinuclear antibody-positive healthy individuals and patients with autoimmune rheumatic diseases. *Arthritis Rheum* 2011;63:191–200.
12. Mahler M, Fritzler MJ. The clinical significance of the dense fine speckled immunofluorescence pattern on HEp-2 cells for the diagnosis of systemic autoimmune diseases. *Clin Dev Immunol* 2012;2012:494356.

13. Fritzler MJ. Clinical relevance of autoantibodies in systemic rheumatic diseases. *Mol Biol Rep* 1996;23:133–145.
14. ter Borg EJ, Horst G, Hummel EJ, *et al.* Measurement of increases in anti-double-stranded DNA antibody levels as a predictor of disease exacerbation in systemic lupus erythematosus: a long-term, prospective study. *Arthritis Rheum* 1990;33:634–643.
15. Kavanaugh AF, Solomon DH; American College of Rheumatology Ad Hoc Committee on Immunologic Testing Guidelines. Guidelines for immunologic laboratory testing in the rheumatic diseases: anti-DNA antibody tests. *Arthritis Rheum* 2002;47:546–555.
16. Isenberg DA, Manson JJ, Ehrenstein MR, *et al.* Fifty years of anti-ds DNA antibodies: are we approaching journey's end? *Rheumatology (Oxford)* 2007;46:1052–1056.
17. Winfield JB, Brunner CM, Koffler D. Serologic studies in patients with systemic lupus erythematosus and central nervous system dysfunction. *Arthritis Rheum* 1978;21:289–294.
18. Janwityanuchit S, Verasertniyom O, Vanichapuntu M, *et al.* Anti-Sm: its predictive value in systemic lupus erythematosus. *Clin Rheumatol* 1993;12:350–353.
19. Wang CL, Ooi L, Wang F. Prevalence and clinical significance of antibodies to ribonucleoproteins in systemic lupus erythematosus in Malaysia. *Br J Rheumatol* 1996;35:129–132.
20. Alba P, Bento L, Cuadrado MJ, *et al.* Anti-dsDNA, anti-Sm antibodies and the lupus anticoagulant: significant factors associated with lupus nephritis. *Ann Rheum Dis* 2003;62:556–560.
21. Benito-Garcia E, Schur PH, Lahita R, *et al.* Guidelines for immunologic laboratory testing in the rheumatic diseases: anti-Sm and anti-RNP antibody tests. *Arthritis Rheum* 2004;51:1030–1044.
22. Thompson D, Juby A, Davis P. The clinical significance of autoantibody profiles in patients with systemic lupus erythematosus. *Lupus* 1993;2:15–19.
23. Hoffman IE, Peene I, Meheus L, *et al.* Specific antinuclear antibodies are associated with clinical features in systemic lupus erythematosus. *Ann Rheum Dis* 2004;63:1155–1158.
24. Ching KH, Burbel PD, Tipton C, *et al.* Two major autoantibody clusters in systemic lupus erythematosus. *PLoS One* 2012;7(2):e32001.
25. Bunn CC, Denton CP, Shi-Wen X, *et al.* Anti-RNA polymerases and other autoantibody specificities in systemic sclerosis. *Br J Rheumatol* 1998;37:15–20.

- 1  
2  
3 26. Brouwer R, Vree Egberts WT, Hengstman GJ, *et al.* Autoantibodies directed to  
4 novel components of the PM/Scl complex, the human exosome. *Arthritis Res*  
5 2002;4:134–138.  
6  
7 27. Sontheimer RD, Maddison PJ, Reichlin M, *et al.* Serologic and HLA associations in  
8 subacute cutaneous lupus erythematosus, a clinical subset of lupus  
9 erythematosus. *Ann Intern Med* 1982;97:664–671.  
10  
11 28. Anderson MJ, Peebles CL, McMillan R, *et al.* Fluorescent antinuclear antibodies  
12 and anti-SSA/Ro in patients with immune thrombocytopenia subsequently  
13 developing systemic lupus erythematosus. *Ann Intern Med* 1985;103:548–550.  
14  
15 29. Mond CB, Peterson MG, Rothfield NF. Correlation of anti-Ro antibody with  
16 photosensitivity rash in systemic lupus erythematosus patients. *Arthritis Rheum*  
17 1989;32:202–204.  
18  
19 30. Baer AN, Maynard JW, Shaikh F, *et al.* Secondary Sjögren's syndrome in systemic  
20 lupus erythematosus defines a distinct disease subset. *J Rheumatol*  
21 2010;37:1143–1149.  
22  
23 31. Franceschini F, Cavazzana I. Anti-Ro/SSA and La/SSB antibodies. *Autoimmunity*  
24 2005;38:55–63.  
25  
26 32. Fritzler MJ, Hanson C, Miller J, *et al.* Specificity of autoantibodies to SS-A/Ro on a  
27 transfected and overexpressed human 60 kDa Ro autoantigen substrate. *J Clin*  
28 *Lab Anal* 2002;16:103–108.  
29  
30 33. Buyon JP, Clancy RM, Friedman DM. Autoimmune associated congenital heart  
31 block: integration of clinical and research clues in the management of the  
32 maternal / foetal dyad at risk. *J Intern Med* 2009;265:653–662.  
33  
34 34. Oke V, Wahren-Herlenius M. The immunobiology of Ro52 (TRIM21) in  
35 autoimmunity: a critical review. *J Autoimmun* 2012;39:77–82.  
36  
37 35. Enocsson H, Wetterö J, Skogh T, *et al.* Soluble urokinase plasminogen activator  
38 receptor levels reflect organ damage in systemic lupus erythematosus. *Transl Res*  
39 2013 (in press). doi: 10.1016/j.trsl.2013.07.003  
40  
41 36. Fries JF, Holman HR. Systemic lupus erythematosus: A clinical analysis. In: Smith  
42 LH, ed. *Major Problems in Internal Medicine*. Philadelphia, London, Toronto W.B.  
43 Saunders; 1975:8–20.  
44  
45 37. Fries JF. Methodology of validation of criteria for SLE. *Scand J Rheumatol* Suppl.  
46 1987;65:25–30.  
47  
48 38. Gladman D, Ginzler E, Goldsmith C, *et al.* The development and initial validation of  
49 the Systemic Lupus International Collaborating Clinics/American College of  
50 Rheumatology damage index for systemic lupus erythematosus. *Arthritis Rheum*  
51 1996;39:363–369.  
52  
53  
54  
55  
56  
57  
58  
59  
60



- 1  
2  
3 39. Churg J, Bernstein J, Glassock RJ: *Renal Disease: Classification and Atlas of*  
4 *Glomerular Diseases* 2nd edition. New York: Igaku-Shoin; 1995.  
5  
6 40. Holman HR, Kunkel HG. Affinity between the lupus erythematosus serum factor  
7 and cell nuclei and nucleoprotein. *Science* 1957;126:162–163.  
8  
9 41. Friou GJ. Antinuclear antibodies: diagnostic significance and methods. *Arthritis*  
10 *Rheum* 1967;10:151–159.  
11  
12 42. Meroni PL, Schur PH. ANA screening: an old test with new recommendations. *Ann*  
13 *Rheum Dis* 2010;69:1420–1422.  
14  
15 43. Proschan MA, Waclawiw MA. Practical guidelines for multiplicity adjustment in  
16 clinical trials. *Control Clin Trials* 2000;21:527–539.  
17  
18 44. Wallace DJ, Stohl W, Furie RA, *et al.* A phase II, randomized, double-blind,  
19 placebo-controlled, dose-ranging study of belimumab in patients with active  
20 systemic lupus erythematosus. *Arthritis Rheum* 2009;61:1168–1178.  
21  
22 45. Hochberg MC, Boyd RE, Ahearn JM, *et al.* Systemic lupus erythematosus: A review  
23 of clinico-laboratory features and immunogenetic markers in 150 patients with  
24 emphasis on demographic subsets. *Medicine (Baltimore)* 1985;64:285–295.  
25  
26 46. To CH, Petri M. Is antibody clustering predictive of clinical subsets and damage in  
27 systemic lupus erythematosus? *Arthritis Rheum* 2005;52:4003–4010.  
28  
29 47. Boey ML, Peebles CL, Tsay G, *et al.* Clinical and autoantibody correlations in  
30 Orientals with systemic lupus erythematosus. *Ann Rheum Dis* 1988;47:918–923.  
31  
32 48. Sutej PG, Gear AJ, Morrison RC, *et al.* Photosensitivity and anti-Ro (SS-A)  
33 antibodies in black patients with systemic lupus erythematosus (SLE). *Br J*  
34 *Rheumatol* 1989;28:321–324.  
35  
36 49. Paz ML, González Maglio DH, Pino M, *et al.* Anti-ribonucleoproteins  
37 autoantibodies in patients with systemic autoimmune diseases. Relation with  
38 cutaneous photosensitivity. *Clin Rheumatol* 2011;30:209–216.  
39  
40 50. Li PH, Wong WH, Lee TL, *et al.* Relationship between autoantibody clustering and  
41 clinical subsets in SLE: cluster and association analyses in Hong Kong Chinese.  
42 *Rheumatology (Oxford)* 2013;52:337–345.  
43  
44 51. Stoll T, Seifert B, Isenberg DA. SLICC/ACR Damage Index is valid, and renal and  
45 pulmonary organ scores are predictors of severe outcome in patients with  
46 systemic lupus erythematosus. *Br J Rheumatol* 1996;35:248–254.  
47  
48 52. Rahman P, Gladman DD, Urowitz MB, *et al.* Early damage as measured by the  
49 SLICC/ACR damage index is a predictor of mortality in systemic lupus  
50 erythematosus. *Lupus* 2001;10:93–96.  
51  
52  
53  
54  
55  
56  
57  
58  
59  
60



- 1  
2  
3 53. Rullo OJ, Woo JM, Parsa MF, *et al*. Plasma levels of osteopontin identify patients at  
4 risk for organ damage in systemic lupus erythematosus. *Arthritis Res Ther*  
5 2013;15:R18.  
6  
7  
8  
9  
10  
11  
12  
13  
14  
15  
16  
17  
18  
19  
20  
21  
22  
23  
24  
25  
26  
27  
28  
29  
30  
31  
32  
33  
34  
35  
36  
37  
38  
39  
40  
41  
42  
43  
44  
45  
46  
47  
48  
49  
50  
51  
52  
53  
54  
55  
56  
57  
58  
59  
60

For peer review only

**FIGURE LEGENDS**

**Figure 1:** Percent of SLE patients by sex and decade of age at disease onset.

**Figure 2:** Percentage of patients fulfilling ACR-82 criterion 3 (photosensitivity) and 5 (arthritis) in relation to anti-Ro/SSA antibody status. Photosensitivity was significantly more common, and arthritis less common, in anti-Ro/SSA antibody positive SLE patients. Data on anti-Ro/SSA antibody status was available in 216 of 222 (97.3%) cases.

**Figure 3:** IF-ANA staining patterns demonstrated for the 219 ever ANA positive SLE patients divided on those who only met the Fries' criteria and those who fulfilled at least 4 out of the 11 ACR-82 criteria.

**Figure 4:** IF-ANA staining patterns demonstrated for the 219 ever ANA positive SLE patients divided on the number of fulfilled ACR-82 criteria.

**Figure 5:** IF-ANA staining patterns demonstrated for the 38 patients that had undergone renal biopsy divided according to the WHO classification for lupus nephritis.

1  
2  
3 **TITLE PAGE**  
4  
5  
6  
7  
8

9 **Manuscript title:** Associations between antinuclear antibody staining patterns and  
10  
11 clinical features of systemic lupus erythematosus: analysis of a regional Swedish register  
12  
13

14  
15  
16  
17 **Authors:** Martina Frodlund, MD<sup>1</sup>; Örjan Dahlström, PhD<sup>2</sup>; Alf Kastbom, MD PhD<sup>1</sup>;  
18  
19 Thomas Skogh, MD PhD<sup>1</sup>; Christopher Sjöwall, MD PhD<sup>1\*</sup>  
20  
21

- 22  
23 1. Rheumatology/AIR, Department of Clinical and Experimental Medicine,  
24 Linköping University, Linköping  
25  
26 2. Linneaus Centre HEAD, Swedish Institute for Disability Research, Department  
27 of Behavioural Sciences and Learning, Linköping University, Linköping,  
28  
29 Sweden  
30  
31  
32  
33

34 **\* Corresponding author:**  
35

36 Rheumatology Unit, University Hospital, SE-581 85 Linköping, Sweden  
37

38 E-mail address: [christopher.sjowall@liu.se](mailto:christopher.sjowall@liu.se)  
39

40 Telephone +46 10 1032416  
41

42 Fax: +46 10 1031844  
43  
44  
45

46 **Running head:** ANA staining patterns *versus* SLE phenotypes  
47  
48  
49  
50

51 **Keywords:** Antinuclear antibodies; Immunofluorescence microscopy; Systemic lupus  
52 erythematosus; Organ damage; **Ro/SSA**  
53  
54

55  
56 **Word count:** 2993  
57  
58  
59  
60

**ABSTRACT**

**Objective.** Antinuclear antibody (ANA) analysis by immunofluorescence (IF) microscopy remains a diagnostic hallmark of systemic lupus erythematosus (SLE). The clinical relevance of ANA fine-specificities in SLE has been addressed repeatedly, whereas studies on IF-ANA staining patterns in relation to disease manifestations are very scarce. This study was done to elucidate whether different staining patterns associate with distinct SLE phenotypes.

**Design:** Observational cohort study.

**Setting:** One university hospital rheumatology unit in Sweden.

**Participants:** The study population consisted of 222 cases (89% women; 93% Caucasians), whereof 178 met  $\geq 4/11$  of the 1982 American College of Rheumatology criteria (ACR-82). The remaining 20% had an SLE diagnosis based on positive IF-ANA (HEp-2 cells) and  $\geq 2$  typical organ manifestations at the time of diagnosis (Fries' criteria).

**Outcome measures:** The IF-ANA staining patterns homogenous (H-ANA), speckled (S-ANA), combined H+S (HS-ANA), centromeric (C-ANA), nucleolar±other patterns (N-ANA), and other nuclear patterns (oANA) were related to disease manifestations and laboratory measures. Antigen-specificities were also considered regarding double-stranded DNA (*Crithidia luciliae*) and the following extractable nuclear antigens: Ro/SSA, La/SSB, Sm, snRNP, Scl-70 and Jo-1 (immunodiffusion and/or line-blot technique).

**Results:** 54% of the SLE patients displayed H-ANA, 22% S-ANA, 11% HS-ANA, 9% N-ANA, 1% C-ANA, 2% oANA and 1% were never ANA positive. Staining patterns among patients meeting Fries' criteria alone did not differ from those fulfilling ACR-82. H-ANA was significantly associated with the 10<sup>th</sup> criterion according to ACR-82 ('immunologic disorder'). S-ANA was inversely associated with arthritis, 'immunologic disorder' and signs of organ damage.

**Conclusions.** H-ANA is the dominant IF-ANA pattern among Swedish SLE patients, and was found to associate with 'immunologic disorder' according to ACR-82. The second most common pattern, S-ANA, associated negatively with arthritis and organ damage.

## ABSTRACT SUMMARY

### Article focus:

- The use of IF microscopy to identify ANA was introduced in the early 1950's, and this technique still remains the gold standard for ANA diagnostics when screening for autoimmune diseases such as SLE.
- Different IF-ANA staining patterns arise depending on the nuclear antigens targeted and, to some extent, the nuclear staining patterns can have diagnostic implications.
- Herein, we asked if the IF-ANA staining pattern of well-characterized SLE patients included in a regional Swedish register contain any valuable clinical information regarding distinct SLE phenotypes.

### Key messages:

- Regardless of the number of fulfilled ACR-82 criteria, H-ANA was the most common IF-ANA pattern among Swedish SLE patients; and this staining was strongly associated with 'immunologic disorder' and anti-dsDNA antibodies.
- S-ANA was the second most common pattern and associated negatively with arthritis and organ damage. These intriguing findings are novel and need to be replicated.
- As previously shown by others, photosensitivity was significantly associated with anti-Ro/SSA antibodies. On the contrary, arthritis was less common among patients with anti-Ro/SSA antibodies.

### Strengths and limitations of this study:

- The large study population with thoroughly organized data and very few internal missing values constitute the strength of this study.

- Although this study confirmed several known associations between serological findings and clinical features, it did not have the power to allow comparisons with specific types of cutaneous lupus, renal disease, central or peripheral nervous system manifestations, as well as with clinical features not included in the ACR criteria.

For peer review only

## INTRODUCTION

The clinical spectrum of systemic lupus erythematosus (SLE) is exceedingly variable with an unpredictable disease course characteristically with episodes of flares and remissions. Ongoing disease exacerbations and cumulative damage/dysfunction over time can significantly interfere with quality of life [1]. Organ systems most commonly involved in SLE include joints, skin, mucous membranes, bone marrow, and kidneys. Despite the considerable differences between SLE patients, the occurrence of antinuclear antibodies (ANA) in serum at the time of diagnosis is a common finding with very few exceptions [2].

An “abnormal titer” of ANA assessed by immunofluorescence (IF) microscopy (IF-ANA) is one of the 11 criteria for SLE according to the 1982 American College of Rheumatology (ACR-82) validated classification criteria [3] as well as the 1997 revised criteria [4]. Also the recently proposed Systemic Lupus International Collaborating Clinics (SLICC) criteria state that an ANA test “above the laboratory reference value” remains a criterion for SLE, but without specifying the method for ANA assessment [5]. Unfortunately, none of the classification grounds state how to define the cut-off level for ANA. Similar to the definition of a positive rheumatoid factor test according to the 1987 ACR classification criteria for rheumatoid arthritis (RA) [6], we advocate a cut-off level of >95<sup>th</sup> percentile among healthy female blood donors to define an abnormal level of ANA analyzed by indirect IF microscopy utilizing fixed HEp-2 cells as source of nuclear antigens and, importantly, gamma-chain specific secondary antibodies to pinpoint IgG-class IF-ANA [7]. At this cut-off level, ANA has very high diagnostic sensitivity for SLE, but low diagnostic specificity, with close to 5% prevalence among healthy female blood

1  
2  
3 donors [8]. Accordingly, ANA testing should only be done upon fair clinical indications of  
4  
5 ANA-related disease. **Although circulating levels of ANA may vary over time in SLE**  
6  
7 **patients, the correlation between IF-ANA titer and clinical activity is poor [9].**  
8  
9

10  
11 Nuclear constituents such as histone proteins, double-stranded (ds) DNA, DNA/histone  
12  
13 complexes (nucleosomes), various nuclear enzymes and other  
14  
15 proteins/ribonucleoproteins are common target antigens for ANA. On the basis of their  
16  
17 different intra-nuclear distributions, IF-ANA staining patterns can be subdivided into  
18  
19 homogenous /chromosomal (H-ANA), centromeric (C-ANA),  
20  
21 speckled/extrachromosomal (S-ANA), nucleolar (N-ANA), nuclear membrane, nuclear  
22  
23 dot and other defined patterns [10]. **The most common ANA pattern detected among**  
24  
25 **healthy individuals has been reported as a uniformly distributed staining of HEp-2 cells**  
26  
27 **in the interphase and a chromosomal staining in dividing cells, designated 'dense fine**  
28  
29 **speckled pattern', whereas we have actually referred to this staining as a**  
30  
31 **homogenous/chromosomal pattern, i.e. H-ANA [8, 11, 12]. A 'classical'**  
32  
33 **homogenous/chromosomal pattern is the most common among SLE patients from**  
34  
35 **southern Sweden as well as in RA [8]. Antibodies against dsDNA, histones and**  
36  
37 **DNA/histone complex all yield a 'classical' H-ANA pattern on HEp-2 cells [13].**  
38  
39 Antibodies against dsDNA, histones and DNA/histone complex all yield an H-ANA  
40  
41 pattern [13]. The presence of anti-dsDNA, which is included in ACR-82 criterion number  
42  
43 10 designated 'immunologic disorder', has been regarded as a fairly specific diagnostic  
44  
45 marker of SLE and is very common in lupus nephritis [2, 10, 13–15]. S-ANA is generated  
46  
47 by antibodies targeting 'extractable nuclear antigens' (ENA), *i.e.* a group of extra-  
48  
49 chromosomal antigens which are readily extracted with 0.15M sodium chloride, for  
50  
51 instance 'small nuclear ribonucleoprotein' (snRNP) and the 'Smith antigen' (Sm), which  
52  
53  
54  
55  
56  
57  
58  
59  
60



1  
2  
3 are both located on U1-RNP particles [2, 10, 13]. Anti-Sm antibody detected by double  
4  
5 radial immunodiffusion (DRID) in gel is highly specific for SLE and practically always  
6  
7 occurs together with anti-snRNP. Anti-Sm has been reported to associate with  
8  
9 constitutional symptoms (pyrexia, weight-loss and fatigue), nephritis and central  
10  
11 nervous system disease, but the sensitivity in cohorts worldwide varies dramatically due  
12  
13 to ethnicity [13, 17–21]. Anti-Sm has also been reported to associate with serositis and  
14  
15 Raynaud’s phenomenon [19, 22–24]. N-ANA patterns are not typical of SLE, but rather of  
16  
17 systemic sclerosis of the diffuse type [25]. N-ANA may be directed against *e.g.* fibrillarin,  
18  
19 RNA-polymerase 1–3, ‘PM-Scl’, and Scl-70 (topoisomerase-1) [10, 13, 26]. Scl-70, which  
20  
21 belongs to the ‘ENA family’, is also found both extra-chromosomally in the nucleoplasm  
22  
23 and bound to DNA, thus giving rise to a mixed IF staining pattern. Like Scl-70, the  
24  
25 **La/SSB** antigen may partly localize in nucleoli. Most experience regarding clinical  
26  
27 associations to anti-ENA refers to DRID analyses. As regards anti-**La/SSB** as well as anti-  
28  
29 **Ro/SSA**, a positive DRID test is clinically linked to Sjögren’s syndrome and to some  
30  
31 extent SLE [22, 27–31]. A positive anti-**La/SSB** DRID test generally occurs together with  
32  
33 anti-**Ro/SSA**, whereas anti-**Ro/SSA** is frequently demonstrated in the absence of anti-  
34  
35 **La/SSB**. Since the concentration of **Ro/SSA** is low in HEp-2 cells, anti-**Ro/SSA** escapes  
36  
37 detection when non-transfected HEp-2 cells are used as ANA substrate for IF  
38  
39 microscopy [32]. In a small proportion of pregnant women with circulating anti-  
40  
41 **Ro52/SSA**, transplacental antibody passage to the fetus can result in neonatal lupus, *i.e.*  
42  
43 typical congenital skin rash (which vanishes in parallel with elimination of the maternal  
44  
45 antibodies) and sometimes also in congenital lifelong complete atrioventricular heart  
46  
47 block [33, 34].  
48  
49  
50  
51  
52  
53  
54  
55  
56  
57  
58  
59  
60

1  
2  
3 Although several studies have dealt with the clinical significance of ANA fine-specificities  
4  
5 in SLE, very few have evaluated if/how different IF-ANA staining patterns may relate to  
6  
7 distinct clinical lupus features. In the present study we aimed at comparing IF-ANA  
8  
9 staining patterns with defined clinical and laboratory disease manifestations among  
10  
11 well-characterized cases of SLE.  
12  
13  
14  
15  
16  
17  
18  
19  
20  
21  
22  
23  
24  
25  
26  
27  
28  
29  
30  
31  
32  
33  
34  
35  
36  
37  
38  
39  
40  
41  
42  
43  
44  
45  
46  
47  
48  
49  
50  
51  
52  
53  
54  
55  
56  
57  
58  
59  
60

For peer review only

## PATIENTS AND METHODS

### Subjects

222 SLE patients (198 women and 24 men; mean age 51 years; range 18–88) taking part in the prospective follow-up programme KLURING (a Swedish acronym for ‘Clinical LUpus Register in Northeastern Gothia’) at the Rheumatology clinic, Linköping university hospital, Sweden were included between September 2008 and November 2012. This corresponds to about 95% of the expected SLE cases in the catchment area of Linköping and  $\geq 98\%$  of all known SLE cases. The patient material was recently described in detail [35]. 178 patients (80%) met the ACR-82 criteria [3], and 44 (20%) had a clinical diagnosis of SLE based on a history of abnormal ANA titer (specified below), and at least 2 typical organ manifestations at the time of diagnosis (referred to as the Fries’ criteria) [36, 37]. **The presence of anti-cardiolipin antibodies of IgG and/or IgM class detected by ELISA and/or positive lupus anticoagulant test (not classified as an immunologic criterion according to ACR-82) was found in 31 of the 44 individuals (70%) in the Fries group.**

Patients were consecutively recruited; most were prevalent cases (85%), but some (15%) had newly diagnosed SLE at the time of enrollment. Distribution of age at disease onset is demonstrated in Figure 1. The median disease duration by year 2012 was 12 years (mean 13.4; range 0–49). Disease severity/organ damage was estimated using the SLICC/ACR damage index (SDI) at the end of year 2011 or from the last observation made [38]. 206 (93%) of the patients were Caucasians. 92 (41%) of the patients were prescribed antimalarials (AM) alone, 68 (31%) other disease-modifying anti-rheumatic

1  
2  
3 drugs  $\pm$  AM and 128 (58%) oral glucocorticoids. IF-ANA staining patterns, anti-ENA  
4  
5 reactivity and dsDNA antibodies were analyzed on a routine basis at the Clinical  
6  
7 immunology laboratory, Linköping university hospital and were extracted from medical  
8  
9 records. In many patients, IF-ANA analysis was performed at several occasions over  
10  
11 time but discrepant staining patterns were achieved in less than 5% of these cases.  
12  
13 Herein, IF-ANA staining pattern from the time-point most adjacent to SLE onset was  
14  
15 used for comparisons with clinical and laboratory features.  
16  
17  
18  
19  
20

### 21 **Indirect IF microscopy**

22  
23 ANA was analyzed by indirect IF microscopy using multispot slides with fixed HEp-2  
24  
25 cells (ImmunoConcepts, Sacramento, CA, USA) as antigen substrate and fluorescein-  
26  
27 isothiocyanate (FITC) conjugated gamma-chain specific anti-human IgG as detection  
28  
29 antibody (DAKO, Glostrup, Denmark). The cut-off level for a positive ANA test was set at  
30  
31 a titer of 1:200, corresponding to >95<sup>th</sup> percentile among 150 healthy female blood  
32  
33 donors. Positive ANA tests were categorized regarding IF staining patterns (H-ANA, S-  
34  
35 ANA, HS-ANA, N-ANA  $\pm$  other pattern, or other staining patterns [here designated  
36  
37 oANA]). To qualify as an H-ANA pattern, chromatin staining was required in  
38  
39 metaphase/anaphase cells and, likewise, absence of chromatin staining was required to  
40  
41 qualify as a pure S-ANA pattern. Microscope slides with fixed *Crithidia luciliae*  
42  
43 (ImmunoConcepts) and FITC conjugated gamma-chain specific anti-human IgG (DAKO)  
44  
45 were used to analyze IgG-class anti-dsDNA antibodies by IF with a cut-off titer at 1:10,  
46  
47 corresponding to >99<sup>th</sup> percentile among 100 (50 males/50 females) healthy blood  
48  
49 donors.  
50  
51  
52  
53  
54  
55  
56  
57  
58  
59  
60

### Anti-ENA antibodies

Autoantibodies to ENA included the following specificities: Ro/SSA, La/SSB, Sm, snRNP, Scl-70 and Jo-1, and were analyzed by DRID (ImmunoConcepts) and/or line-blot technique (ProfilePlus, R052 Euroassay, Euroimmun, Lübeck, Germany). In the case line-blot screening resulted in positive reactions regarding antibodies against Sm, Jo-1 or Scl-70, these specificities were confirmed by DRID in order to qualify as positive. For the other anti-ENA specificities, good reproducibility has been reassured at the performing laboratory.

### Routine laboratory analyses

To assess hematologic and renal disorders, laboratory tests at selected visits included hemoglobin and blood cell counts (erythrocytes, total leukocyte count, lymphocytes, neutrophils and platelets) as well as urinalysis (dip-slide procedure for erythrocytes, protein and glucose), urinary sediment assessment and serum creatinine. Lupus anticoagulant was performed by the dilute Russell's viper venom test (DRVVT).

### Renal histopathology

38 of the included patients (*i.e.* 79% of those who fulfilled ACR-82 criterion number 7 'renal disorder') had undergone renal biopsy performed by percutaneous ultrasonography-guided puncture in accordance with a standard protocol. The renal tissue obtained was classified according to the WHO classification for lupus nephritis [39]. All biopsies were evaluated by conventional light microscopy, direct IF and electron microscopy.

## Statistics

Frequencies of the different IF-ANA staining patterns in the study group were analyzed to identify subgroups for further analyses. Clinical and laboratory features were described by their frequencies, for each of most common pattern subgroups separately. Differences in distributions of different staining patterns regarding clinical and laboratory features were analyzed using Chi-square tests of independence (alternatively Fisher's exact test in case of small expected frequencies) with Cramer's V as measure of effect size. All statistics were performed using IBM SPSS 20.0. **For each statistical test, exact *p*-values (non-adjusted) are reported.**

## Ethical considerations

Oral and written informed consent was obtained from all subjects. The study protocol was approved by the regional ethics committee in Linköping, Sweden (M75-08/2008).

## RESULTS

Frequencies of clinical and laboratory features are displayed in Table 1ab. 219 of 222 (99%) were found to be ever ANA positive. Skin disease and arthritis were the most commonly fulfilled ACR-82 criteria followed by 'hematologic disorder'. 22% of the patients had renal disease and 44% showed positive anti-dsDNA antibody test at least once during their disease course. However, 5 individuals were classified with unknown or other pattern (oANA) since the Clinical immunology laboratory was unable to recover documentation of IF-ANA patterns or classified the positive nuclear staining pattern as very rare (nuclear dots). 4 of these 5 individuals were prescribed at least one disease-modifying drug. H-ANA staining was by far the most frequent pattern (54%) followed by S-ANA (22%), HS-ANA (11%), N-ANA ± other pattern (9%) and C-ANA (1%). The first 4 pattern groups were considered large enough for statistical comparisons.

Some clinical and laboratory features showed differences in proportions over different staining patterns (Table 1). 'Immunologic disorder' (the 10<sup>th</sup> ACR-82 criterion) and anti-dsDNA antibodies were more often associated with H-ANA, and less often associated with S-ANA; whereas anti-snRNP showed the opposite direction (moderate to strong effects). Central nervous system disease was less often associated with H-ANA compared to other staining patterns, but the number of affected individuals was very low. Anti-Sm was more often, whereas arthritis and organ damage (SDI ≥1) respectively were less often, associated with S-ANA. Anti-Ro/SSA and anti-La/SSB antibodies were more often associated with HS-ANA. No significant differences in proportions of the number of concomitant anti-nuclear antibody fine-specificities over different staining patterns

1  
2  
3  
4  
5  
6  
7  
8  
9  
10  
11  
12  
13  
14  
15  
16  
17  
18  
19  
20  
21  
22  
23  
24  
25  
26  
27  
28  
29  
30  
31  
32  
33  
34  
35  
36  
37  
38  
39  
40  
41  
42  
43  
44  
45  
46  
47  
48  
49  
50  
51  
52  
53  
54  
55  
56  
57  
58  
59  
60

were recorded.

For peer review only



Table 1a

| Clinical feature<br>(ACR-82) | H-ANA<br>(%) | S-ANA<br>(%) | HS-ANA<br>(%) | N-ANA*<br>(%) | P-value           | Cramer's V | C-ANA<br>(%) | oANA<br>(%) | Total (%) |
|------------------------------|--------------|--------------|---------------|---------------|-------------------|------------|--------------|-------------|-----------|
|                              | (n = 119)    | (n = 49)     | (n = 24)      | (n = 19)      |                   |            | (n = 3)      | (n = 5)     |           |
| Malar rash                   | 42.0         | 53.1         | 41.7          | 31.6          | 0.38              |            | 0            | 80          | 43.8      |
| Discoid lupus                | 12.6         | 18.4         | 20.8          | 10.5          | 0.57 <sup>†</sup> |            | 33           | 20          | 15.1      |
| Photosensitivity             | 47.9         | 65.3         | 58.3          | 36.8          | 0.09              |            | 33           | 80          | 52.5      |
| Oral ulcers                  | 10.1         | 16.3         | 12.5          | 10.5          | 0.68 <sup>†</sup> |            | 0            | 0           | 11.4      |
| Arthritis                    | 76.5         | 63.3 –       | 91.7          | 89.5          | 0.02              | 0.23       | 100          | 100         | 77.2      |
| Serositis                    | 42.9         | 38.8         | 25.0          | 47.4          | 0.38              |            | 100          | 20          | 40.6      |
| Pleuritis                    | 38.7         | 34.7         | 25.0          | 36.8          | 0.64              |            | 100          | 20          | 36.5      |
| Pericarditis                 | 16.0         | 14.3         | 0.0           | 15.8          | 0.15 <sup>†</sup> |            | 33           | 0           | 13.7      |
| Renal disorder               | 24.4         | 16.3         | 29.2          | 15.8          | 0.49              |            | 33           | 0           | 21.9      |
| Neurologic disorder          | 1.7 –        | 8.2          | 8.3           | 10.5          | 0.04 <sup>†</sup> | 0.17       | 33           | 0           | 5.0       |
| Seizures                     | 0.8 –        | 6.1          | 8.3           | 10.5          | 0.02 <sup>†</sup> | 0.19       | 33           | 0           | 4.1       |
| Psychosis                    | 0.8          | 2.0          | 0.0           | 5.3           | 0.22 <sup>†</sup> |            | 0            | 0           | 1.4       |
| Hematologic disorder         | 48.7         | 59.2         | 58.3          | 42.1          | 0.45              |            | 33           | 0           | 50.2      |
| Immunologic disorder         | 64.7 +       | 24.5 –       | 33.3          | 31.6          | <0.001            | 0.37       | 33           | 0           | 47.5      |
| Antinuclear antibody         | 100          | 100          | 100           | 100           |                   |            | 100          | 100         | 100       |
| ≥ 6 fulfilled ACR criteria   | 26.9         | 24.5         | 20.8          | 15.8          | 0.73              |            | 33           | 0           | 24.2      |
| SDI score ≥ 1                | 59.7         | 30.6 –       | 54.2          | 57.9          | 0.007             | 0.24       | 67           | 60          | 52.5      |

H = Homogenous. S = Speckled, HS = Homogenous/Speckled, N = Nucleolar, C = Centromeric, oANA = other pattern, + = positive association, – = negative association.

\* Staining pattern ± combination with other pattern(s).

<sup>†</sup> Fisher's exact test.

Table 1b

| Laboratory feature               | H-ANA (%) | S-ANA (%) | HS-ANA (%) | N-ANA* (%) | P-value             | Cramer's V | C-ANA (%) | oANA (%) | Total (%) |
|----------------------------------|-----------|-----------|------------|------------|---------------------|------------|-----------|----------|-----------|
|                                  | (n = 119) | (n = 49)  | (n = 24)   | (n = 19)   |                     |            | (n = 3)   | (n = 5)  |           |
| Hemolytic anemia                 | 2.5       | 8.2       | 4.2        | 5.3        | 0.30 <sup>†</sup>   |            | 0         | 0        | 4.1       |
| Leukocytopenia                   | 29.4      | 30.6      | 33.3       | 21.1       | 0.84                |            | 33        | 0        | 28.8      |
| Lymphocytopenia                  | 27.7      | 32.7      | 33.3       | 31.6       | 0.90                |            | 0         | 0        | 28.8      |
| Thrombocytopenia                 | 10.1      | 16.3      | 12.5       | 5.3        | 0.59 <sup>†</sup>   |            | 0         | 0        | 11.0      |
| Lupus anticoagulant <sup>#</sup> | 34.6      | 24.3      | 33.3       | 38.5       | 0.68                |            | 33        | 50       | 32.5      |
| Anti-dsDNA                       | 63.9 +    | 12.2 –    | 33.3       | 26.3       | <0.001              | 0.45       | 33        | 0        | 43.8      |
| Anti-Sm                          | 3.4       | 16.7 +    | 4.2        | 10.5       | 0.022 <sup>†</sup>  | 0.21       | 0         | 0        | 7.0       |
| Anti-Ro/SSA                      | 32.8      | 43.8      | 62.5 +     | 36.8       | 0.047               | 0.20       | 33        | 0        | 38.5      |
| Anti-La/SSB                      | 7.0       | 12.8      | 33.3 +     | 0          | 0.002 <sup>†</sup>  | 0.29       | 0         | 0        | 11.8      |
| Anti-snRNP                       | 6.9 –     | 47.8 +    | 13.6       | 22.2       | <0.001 <sup>†</sup> | 0.43       | 0         | 0        | 20.2      |

H = Homogenous. S = Speckled, HS = Homogenous/Speckled, N = Nucleolar, C = Centromeric, oANA = other pattern, + = positive association, – = negative association.

\* Staining pattern ± combination with other pattern(s).

<sup>†</sup> Fisher's exact test.

<sup>#</sup> Not analyzed in all patients; H-ANA: n = 81, S-ANA: n = 37, HS-ANA: n = 18, N-ANA: n = 13, C-ANA: n = 3, oANA: n = 2.

1  
2  
3 Photosensitivity was significantly associated with anti-Ro/SSA antibodies (Figure 2). On  
4  
5 the contrary, arthritis was less common among patients with anti-Ro/SSA antibodies. A  
6  
7 positive anti-Sm antibody test was significantly associated with lymphocytopenia  
8  
9 (Fisher's exact test,  $p = 0.014$ , Cramer's  $V = 0.19$ ); and as expected, a positive anti-dsDNA  
10  
11 antibody test was significantly associated with renal disorder (Chi-square test,  $p < 0.001$ ,  
12  
13 Cramer's  $V = 0.34$ ).  
14  
15

16  
17  
18  
19  
20 The proportions of different staining patterns in the group of patients fulfilling only the  
21  
22 Fries' criteria and those meeting the ACR-82 criteria are demonstrated in Figure 3. The  
23  
24 higher proportion of patients with nucleolar staining in the Fries' group as compared to  
25  
26 the ACR-82 group did not meet statistical significance (Fisher's exact test,  $p = 0.064$ ).  
27  
28 Figure 4 demonstrates the number of fulfilled ACR criteria in relation to nuclear staining  
29  
30 patterns. H-ANA was found to dominate regardless of the number of fulfilled ACR  
31  
32 criteria. As indicated in Figure 5, H-ANA was significantly more common in patients that  
33  
34 had been classified with proliferative lupus nephritis (WHO class 3 or 4) on renal biopsy  
35  
36 (Chi-square test,  $p < 0.001$ ) compared to other staining patterns.  
37  
38  
39  
40  
41  
42  
43  
44  
45  
46  
47  
48  
49  
50  
51  
52  
53  
54  
55  
56  
57  
58  
59  
60

## DISCUSSION

The use of IF microscopy to identify antinuclear antibodies was introduced by Holman, Kunkel and Friou already in the early 1950's [40, 41], and still remains the gold standard for ANA diagnostics [9, 42]. Different IF-ANA staining patterns arise depending on the nuclear antigens targeted and, to some extent, the nuclear staining patterns can have diagnostic implications [10, 13]. Being an exceptionally heterogeneous disease entity, different SLE phenotypes may associate with different ANA subspecificities.

Nevertheless, studies on IF-ANA staining patterns in relation to SLE subtypes are very scarce. Thus, herein we asked if the IF-ANA staining pattern of well-characterized SLE patients in a regional Swedish register *per se* contain any valuable clinical information.

No corrections for multiple comparisons were made, but by reporting the exact *p*-values this can easily be done with a preferred method [43].

In a previous investigation based on South Swedish SLE patients who had all been judged IF-ANA positive at the time-point of diagnosis, a considerable proportion (24%) lost their ANA positivity over time [8]. This may appear surprising, but our findings are very consistent with the results from a recent clinical trial for belimumab in SLE [44]. Our study demonstrated that, among those remaining IF-ANA positive over time, the vast majority (62%) displayed H-ANA ± other pattern, whereas fewer had a pure S-ANA pattern (10%). In the present study, we confirmed that H-ANA is the most common IF-ANA pattern among Swedish SLE patients regardless of the number of fulfilled ACR criteria. The fact that we did not find any significant difference between ANA staining patterns in patients fulfilling the ACR-82 classification criteria and those that only met

1  
2  
3 Fries' criteria probably reflects that the ACR-82 criteria have a lower sensitivity and fail  
4  
5 to identify all patients with 'clinical SLE' and at least 2 typical organ manifestations.  
6  
7  
8  
9

10  
11 Many have dealt with differences in ANA fine-specificity and grouped patients according  
12  
13 to ANA seroprofiles in order to reveal potential associations with defined clinical lupus  
14  
15 manifestations [17–20, 22–24, 27–31, 45, 46]. Using the luciferase immunoprecipitation  
16  
17 system, Ching *et al.* recently reported that the anti-Sm/snRNP-cluster was more  
18  
19 associated with serositis than with the anti-SSA/SSB cluster [24]. Thompson and  
20  
21 colleagues observed that SLE cases with anti-dsDNA and/or anti-Sm were more likely to  
22  
23 have malar rash, hypocomplementemia, renal and hematologic involvement than  
24  
25 patients without these autoantibodies [22]. Our finding of a significant association  
26  
27 between anti-Ro/SSA and photosensitivity was expected since several studies reported  
28  
29 that anti-Ro/SSA positive patients have an increased rate of lupus-related rash and  
30  
31 photosensitivity [22, 27, 29]. However, in other studies the correlation between anti-  
32  
33 Ro/SSA and skin disease has been less clear [19, 47–49].  
34  
35  
36  
37  
38  
39  
40  
41

42 In a recent and very large study from China, 1928 SLE patients from 5 different centers  
43  
44 were studied according to serological profiles [50]. The presence of anti-dsDNA was  
45  
46 found to be associated with renal disorder, serositis and hematological involvement. In  
47  
48 our study, anti-dsDNA was exclusively associated with renal disorder. Only 15% of the  
49  
50 Chinese lupus cohort exhibited the anti-Sm/snRNP/phospholipid-cluster, but these  
51  
52 patients had the highest frequency of malar rash, oral ulcers, arthritis and serositis [50].  
53  
54 As expected, skin disease/photosensitivity was associated with the anti-SSA/SSB cluster,  
55  
56 but contrasting to our findings Li *et al.* reported a positive association between anti-SSA  
57  
58  
59  
60

1  
2  
3 and arthritis. The reason for the contradictory findings may be sought in differences in  
4  
5 methodology as well as in genetic factors.  
6  
7  
8  
9

10  
11 Organ damage is strongly connected to SLE prognosis [51, 52], but only one biomarker  
12  
13 (osteopontin) has so far been shown to predict organ damage [53]. In the present study,  
14  
15 organ damage (SDI  $\geq 1$ ) was significantly less common among patients with S-ANA. This  
16  
17 is a novel finding which calls for confirmation by others. A plausible explanation is that  
18  
19 anti-dsDNA antibodies were also less common among cases with S-ANA and, given the  
20  
21 strong association between anti-dsDNA and lupus nephritis [15, 16, 20], patients with S-  
22  
23 ANA may have less (or at least milder) renal disease with a subsequent risk of  
24  
25 developing organ damage. Another possible explanation is the well-documented  
26  
27 association between anti-SSA/SSB and milder disease manifestations, *e.g.* lupus-related  
28  
29 rash and photosensitivity [22, 27, 29]. Importantly, however, anti-SSA antibodies are not  
30  
31 visualized on standard HEp-2 cells (used in this study) since the antigen levels are low.  
32  
33  
34  
35  
36  
37  
38  
39

40 To conclude, the results of this study demonstrate that IF-ANA staining patterns have  
41  
42 some clinical correlates of potential diagnostic and prognostic interest in addition to  
43  
44 traditional antigen-specific immunoassays. The findings that arthritis and signs of organ  
45  
46 damage were less often associated with S-ANA compared to other staining patterns call  
47  
48 for confirmatory studies and further elaborations, including identification of ANA fine-  
49  
50 specificities.  
51  
52  
53  
54  
55  
56  
57  
58  
59  
60

1  
2  
3 **Acknowledgements.** We thank research nurse Marianne Peterson and all the clinicians  
4  
5 for their efforts.  
6  
7  
8  
9

10  
11 **Contributors.** MF was involved in conception and design of the study, data collection  
12 and manuscript writing. ÖD contributed with statistical advice, interpretation of data  
13 and drafted the paper. AK was involved in acquisition of patient data, interpretation of  
14 data, intellectual discussion and manuscript writing. TS was involved in the laboratory  
15 work, interpretation of data, intellectual discussion and drafted the paper. CS  
16 contributed to the original idea, patient characterization, interpretation of data,  
17 intellectual discussion and manuscript writing.  
18  
19  
20  
21  
22  
23  
24  
25  
26  
27  
28  
29  
30

31 **Funding.** The study was financed by grants from the Swedish Research Council, the  
32 County Council of Östergötland, the Swedish Society for Medical Research, the Swedish  
33 Rheumatism Association, the Swedish Society of Medicine, the Professor Nanna Svartz  
34 foundation, the King Gustaf V 80-year foundation, and the research foundation in  
35 memory of Ingrid Asp.  
36  
37  
38  
39  
40  
41  
42  
43  
44  
45

46 **Competing interests.** None.  
47  
48  
49  
50  
51

52 **Ethics approval.** The regional ethics committee in Linköping, Sweden.  
53  
54  
55  
56  
57  
58  
59  
60

## REFERENCES

1. Lateef A, Petri M. Unmet medical needs in systemic lupus erythematosus. *Arthritis Res Ther* 2012;14 Suppl. 4:S4
2. Rahman A, Isenberg DA. Systemic lupus erythematosus. *N Engl J Med* 2008;358:929–939.
3. Tan EM, Cohen AS, Fries JF, *et al.* The 1982 revised criteria for the classification of systemic lupus erythematosus. *Arthritis Rheum* 1982;25:1271–1277.
4. Hochberg MC. Updating the American College of Rheumatology revised criteria for the classification of systemic lupus erythematosus. *Arthritis Rheum* 1997;40:1725.
5. Petri M, Orbai AM, Alarcón GS, *et al.* Derivation and validation of the Systemic Lupus International Collaborating Clinics classification criteria for systemic lupus erythematosus. *Arthritis Rheum* 2012;64:2677–2686.
6. Arnett FC, Edworthy SM, Bloch DA, *et al.* The American Rheumatism Association 1987 revised criteria for the classification of rheumatoid arthritis. *Arthritis Rheum* 1988;31:315–324.
7. Dahle C, Skogh T, Åberg AK, *et al.* Methods of choice for diagnostic antinuclear antibody (ANA) screening: benefit of adding antigen-specific assays to immunofluorescence microscopy. *J Autoimmun* 2004;22:241–248.
8. Sjöwall C, Sturm M, Dahle C, *et al.* Abnormal antinuclear antibody titers are less common than generally assumed in established cases of systemic lupus erythematosus. *J Rheumatol* 2008;35:1994–2000.
9. Solomon DH, Kavanaugh AJ, Schur PH, *et al.* Evidence-based guidelines for the use of immunologic tests: antinuclear antibody testing. *Arthritis Rheum* 2002;47:434–444.
10. von Mühlen CA, Tan EM. Autoantibodies in the diagnosis of systemic lupus erythematosus. *Semin Arthritis Rheum* 1995;5:323–358
11. Mariz HA, Sato EI, Barbosa SH, *et al.* Pattern on the antinuclear antibody-HEp-2 test is a critical parameter for discriminating antinuclear antibody-positive healthy individuals and patients with autoimmune rheumatic diseases. *Arthritis Rheum* 2011;63:191–200.
12. Mahler M, Fritzler MJ. The clinical significance of the dense fine speckled immunofluorescence pattern on HEp-2 cells for the diagnosis of systemic autoimmune diseases. *Clin Dev Immunol* 2012;2012:494356.



- 1  
2  
3 13. Fritzler MJ. Clinical relevance of autoantibodies in systemic rheumatic diseases.  
4 *Mol Biol Rep* 1996;23:133–145.  
5  
6  
7 14. ter Borg EJ, Horst G, Hummel EJ, *et al*. Measurement of increases in anti-double-  
8 stranded DNA antibody levels as a predictor of disease exacerbation in systemic  
9 lupus erythematosus: a long-term, prospective study. *Arthritis Rheum*  
10 1990;33:634–643.  
11  
12 15. Kavanaugh AF, Solomon DH; American College of Rheumatology Ad Hoc  
13 Committee on Immunologic Testing Guidelines. Guidelines for immunologic  
14 laboratory testing in the rheumatic diseases: anti-DNA antibody tests. *Arthritis*  
15 *Rheum* 2002;47:546–555.  
16  
17  
18 16. Isenberg DA, Manson JJ, Ehrenstein MR, *et al*. Fifty years of anti-ds DNA  
19 antibodies: are we approaching journey's end? *Rheumatology (Oxford)*  
20 2007;46:1052–1056.  
21  
22 17. Winfield JB, Brunner CM, Koffler D. Serologic studies in patients with systemic  
23 lupus erythematosus and central nervous system dysfunction. *Arthritis Rheum*  
24 1978;21:289–294.  
25  
26  
27 18. Janwityanuchit S, Verasertniyom O, Vanichapuntu M, *et al*. Anti-Sm: its predictive  
28 value in systemic lupus erythematosus. *Clin Rheumatol* 1993;12:350–353.  
29  
30 19. Wang CL, Ooi L, Wang F. Prevalence and clinical significance of antibodies to  
31 ribonucleoproteins in systemic lupus erythematosus in Malaysia. *Br J Rheumatol*  
32 1996;35:129–132.  
33  
34  
35 20. Alba P, Bento L, Cuadrado MJ, *et al*. Anti-dsDNA, anti-Sm antibodies and the lupus  
36 anticoagulant: significant factors associated with lupus nephritis. *Ann Rheum Dis*  
37 2003;62:556–560.  
38  
39 21. Benito-Garcia E, Schur PH, Lahita R, *et al*. Guidelines for immunologic laboratory  
40 testing in the rheumatic diseases: anti-Sm and anti-RNP antibody tests. *Arthritis*  
41 *Rheum* 2004;51:1030–1044.  
42  
43  
44 22. Thompson D, Juby A, Davis P. The clinical significance of autoantibody profiles in  
45 patients with systemic lupus erythematosus. *Lupus* 1993;2:15–19.  
46  
47 23. Hoffman IE, Peene I, Meheus L, *et al*. Specific antinuclear antibodies are  
48 associated with clinical features in systemic lupus erythematosus. *Ann Rheum Dis*  
49 2004;63:1155–1158.  
50  
51  
52 24. Ching KH, Burbel PD, Tipton C, *et al*. Two major autoantibody clusters in systemic  
53 lupus erythomatousus. *PLoS One* 2012;7(2):e32001.  
54  
55 25. Bunn CC, Denton CP, Shi-Wen X, *et al*. Anti-RNA polymerases and other  
56 autoantibody specificities in systemic sclerosis. *Br J Rheumatol* 1998;37:15–20.  
57  
58  
59  
60

- 1  
2  
3 26. Brouwer R, Vree Egberts WT, Hengstman GJ, *et al.* Autoantibodies directed to  
4 novel components of the PM/Scl complex, the human exosome. *Arthritis Res*  
5 2002;4:134–138.  
6  
7 27. Sontheimer RD, Maddison PJ, Reichlin M, *et al.* Serologic and HLA associations in  
8 subacute cutaneous lupus erythematosus, a clinical subset of lupus  
9 erythematosus. *Ann Intern Med* 1982;97:664–671.  
10  
11 28. Anderson MJ, Peebles CL, McMillan R, *et al.* Fluorescent antinuclear antibodies  
12 and anti-SSA/Ro in patients with immune thrombocytopenia subsequently  
13 developing systemic lupus erythematosus. *Ann Intern Med* 1985;103:548–550.  
14  
15 29. Mond CB, Peterson MG, Rothfield NF. Correlation of anti-Ro antibody with  
16 photosensitivity rash in systemic lupus erythematosus patients. *Arthritis Rheum*  
17 1989;32:202–204.  
18  
19 30. Baer AN, Maynard JW, Shaikh F, *et al.* Secondary Sjögren's syndrome in systemic  
20 lupus erythematosus defines a distinct disease subset. *J Rheumatol*  
21 2010;37:1143–1149.  
22  
23 31. Franceschini F, Cavazzana I. Anti-Ro/SSA and La/SSB antibodies. *Autoimmunity*  
24 2005;38:55–63.  
25  
26 32. Fritzler MJ, Hanson C, Miller J, *et al.* Specificity of autoantibodies to SS-A/Ro on a  
27 transfected and overexpressed human 60 kDa Ro autoantigen substrate. *J Clin*  
28 *Lab Anal* 2002;16:103–108.  
29  
30 33. Buyon JP, Clancy RM, Friedman DM. Autoimmune associated congenital heart  
31 block: integration of clinical and research clues in the management of the  
32 maternal / foetal dyad at risk. *J Intern Med* 2009;265:653–662.  
33  
34 34. Oke V, Wahren-Herlenius M. The immunobiology of Ro52 (TRIM21) in  
35 autoimmunity: a critical review. *J Autoimmun* 2012;39:77–82.  
36  
37 35. Enocsson H, Wetterö J, Skogh T, *et al.* Soluble urokinase plasminogen activator  
38 receptor levels reflect organ damage in systemic lupus erythematosus. *Transl Res*  
39 2013 (in press). doi: 10.1016/j.trsl.2013.07.003  
40  
41 36. Fries JF, Holman HR. Systemic lupus erythematosus: A clinical analysis. In: Smith  
42 LH, ed. *Major Problems in Internal Medicine*. Philadelphia, London, Toronto W.B.  
43 Saunders; 1975:8–20.  
44  
45 37. Fries JF. Methodology of validation of criteria for SLE. *Scand J Rheumatol Suppl.*  
46 1987;65:25–30.  
47  
48 38. Gladman D, Ginzler E, Goldsmith C, *et al.* The development and initial validation of  
49 the Systemic Lupus International Collaborating Clinics/American College of  
50 Rheumatology damage index for systemic lupus erythematosus. *Arthritis Rheum*  
51 1996;39:363–369.  
52  
53  
54  
55  
56  
57  
58  
59  
60

- 1  
2  
3 39. Churg J, Bernstein J, Glassock RJ: *Renal Disease: Classification and Atlas of*  
4 *Glomerular Diseases* 2nd edition. New York: Igaku-Shoin; 1995.  
5  
6 40. Holman HR, Kunkel HG. Affinity between the lupus erythematosus serum factor  
7 and cell nuclei and nucleoprotein. *Science* 1957;126:162–163.  
8  
9 41. Friou GJ. Antinuclear antibodies: diagnostic significance and methods. *Arthritis*  
10 *Rheum* 1967;10:151–159.  
11  
12 42. Meroni PL, Schur PH. ANA screening: an old test with new recommendations. *Ann*  
13 *Rheum Dis* 2010;69:1420–1422.  
14  
15 43. Proschan MA, Waclawiw MA. Practical guidelines for multiplicity adjustment in  
16 *clinical trials. Control Clin Trials* 2000;21:527–539.  
17  
18 44. Wallace DJ, Stohl W, Furie RA, *et al.* A phase II, randomized, double-blind,  
19 placebo-controlled, dose-ranging study of belimumab in patients with active  
20 systemic lupus erythematosus. *Arthritis Rheum* 2009;61:1168–1178.  
21  
22 45. Hochberg MC, Boyd RE, Ahearn JM, *et al.* Systemic lupus erythematosus: A review  
23 of clinico-laboratory features and immunogenetic markers in 150 patients with  
24 emphasis on demographic subsets. *Medicine (Baltimore)* 1985;64:285–295.  
25  
26 46. To CH, Petri M. Is antibody clustering predictive of clinical subsets and damage in  
27 systemic lupus erythematosus? *Arthritis Rheum* 2005;52:4003–4010.  
28  
29 47. Boey ML, Peebles CL, Tsay G, *et al.* Clinical and autoantibody correlations in  
30 Orientals with systemic lupus erythematosus. *Ann Rheum Dis* 1988;47:918–923.  
31  
32 48. Sutej PG, Gear AJ, Morrison RC, *et al.* Photosensitivity and anti-Ro (SS-A)  
33 antibodies in black patients with systemic lupus erythematosus (SLE). *Br J*  
34 *Rheumatol* 1989;28:321–324.  
35  
36 49. Paz ML, González Maglio DH, Pino M, *et al.* Anti-ribonucleoproteins  
37 autoantibodies in patients with systemic autoimmune diseases. Relation with  
38 cutaneous photosensitivity. *Clin Rheumatol* 2011;30:209–216.  
39  
40 50. Li PH, Wong WH, Lee TL, *et al.* Relationship between autoantibody clustering and  
41 clinical subsets in SLE: cluster and association analyses in Hong Kong Chinese.  
42 *Rheumatology (Oxford)* 2013;52:337–345.  
43  
44 51. Stoll T, Seifert B, Isenberg DA. SLICC/ACR Damage Index is valid, and renal and  
45 pulmonary organ scores are predictors of severe outcome in patients with  
46 systemic lupus erythematosus. *Br J Rheumatol* 1996;35:248–254.  
47  
48 52. Rahman P, Gladman DD, Urowitz MB, *et al.* Early damage as measured by the  
49 SLICC/ACR damage index is a predictor of mortality in systemic lupus  
50 erythematosus. *Lupus* 2001;10:93–96.  
51  
52  
53  
54  
55  
56  
57  
58  
59  
60

1  
2  
3  
4  
5  
6  
7  
8  
9  
10  
11  
12  
13  
14  
15  
16  
17  
18  
19  
20  
21  
22  
23  
24  
25  
26  
27  
28  
29  
30  
31  
32  
33  
34  
35  
36  
37  
38  
39  
40  
41  
42  
43  
44  
45  
46  
47  
48  
49  
50  
51  
52  
53  
54  
55  
56  
57  
58  
59  
60

53. Rullo OJ, Woo JM, Parsa MF, *et al*. Plasma levels of osteopontin identify patients at risk for organ damage in systemic lupus erythematosus. *Arthritis Res Ther* 2013;15:R18.

For peer review only

## FIGURE LEGENDS

**Figure 1:** Percent of SLE patients by sex and decade of age at disease onset.

**Figure 2:** Percentage of patients fulfilling ACR-82 criterion 3 (photosensitivity) and 5 (arthritis) in relation to anti-Ro/SSA antibody status. Photosensitivity was significantly more common, and arthritis less common, in anti-Ro/SSA antibody positive SLE patients. Data on anti-Ro/SSA antibody status was available in 216 of 222 (97.3%) cases.

**Figure 3:** IF-ANA staining patterns demonstrated for the 219 ever ANA positive SLE patients divided on those who only met the Fries' criteria and those who fulfilled at least 4 out of the 11 ACR-82 criteria.

**Figure 4:** IF-ANA staining patterns demonstrated for the 219 ever ANA positive SLE patients divided on the number of fulfilled ACR-82 criteria.

**Figure 5:** IF-ANA staining patterns demonstrated for the 38 patients that had undergone renal biopsy divided according to the WHO classification for lupus nephritis.

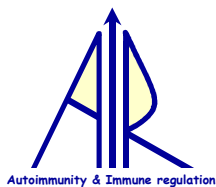

Department of Clinical and Experimental Medicine  
**AIR/Rheumatology**  
August 30th, 2013

To the attention of Dr. Trish Groves  
Editor-in-Chief *BMJ Open*

**Concerning manuscript:** bmjopen-2013-003608 entitled “Associations between anti-nuclear antibody staining patterns and clinical features of systemic lupus erythematosus: analysis of a regional Swedish register”

Dear Dr. Groves,

Thank you for reviewing our manuscript. Please find our point-by-point responses below. We hope that you now find our manuscript acceptable for publication in *BMJ Open*.

On behalf of all authors,

Christopher Sjöwall, corresponding author

---

**Christopher Sjöwall**, M.D. Ph.D., Associate Professor  
Rheumatology Unit, University Hospital, SE-581 85 Linköping, Sweden  
christopher.sjowall@liu.se

## Point-by-point responses to the comments made by the referees

**Reviewer: Peter H Schur MD**, Brigham and Womens Hospital-Harvard Med School, Medicine

1. When one is doing multiple comparisons and thus calculating p values, one needs to correct for type I error (that the differences could have been due to chance) by using a Bonferroni or equivalent correction, such as multiplying all the p values by the number of comparisons in which p values were shown to get a corrected p value--your tables show 26 p values--thus if you multiply all your p values by 26, the only noncorrected p values that will remain "significant" is a uncorrected p of <0.001

**Reply:** We completely agree with the reviewer that results should be associated with appropriate correction (Bonferroni is one such very conservative correction) when *interpreting* the p-values in Table 1a and 1b. There are many different ways to apply such a correction, which should be based on how many independent sets of tests that have been performed and then attached with a proper family-wise significance level for each such set (e.g. *Proschan MA, Waclawiw MA. Control Clin Trials 2000;21:527-39*). We had a discussion in the author-group as to whether we should decide upon a division of tests into different sets, and also on a given correction method within each such set with a given family-wise significance level. Opinions vary greatly regarding how to divide the tests and regarding the method of choice when applying the correction. According to our opinion, it is most honest to report the exact p-values for each test, regardless of statistical significance. We also think that the exploratory nature of this study motivates reporting the exact results of each test (hopefully they will generate other studies to confirm or reject the findings presented in this manuscript). It should thereby be an easy task for every reader, if she or he prefers, to adjust the significance level by her/his own preferred method (for example by the Bonferroni method mentioned by the reviewer). However, judged from the reviewer's comment, we realize that this was not evident from the text in the first draft of the manuscript. We have therefore included a comment that hopefully clarifies this concern:

**Page 12, line 8-9:**

*Removed sentence:* P-values <0.05 were considered significant

*Replaced with:* For each statistical test, exact p-values (non-adjusted) are reported.

**Page 17, line 12-13:**

*Inserted sentence:* No corrections for multiple comparisons were made, but by reporting the exact p-values this can easily be done with a preferred method [43].

**Page 24:**

43. Proschan MA, Waclawiw MA. Practical guidelines for multiplicity adjustment in clinical trials. *Control Clin Trials* 2000;21:527-539.

Some critical references omitted. There are a number of papers etc. omitted as follows:

1. No correlation with ANA titer and clinical activity (DH Solomon et al *Arth Rheum* 2002; 47:434-44

**Reply:** This paper was indeed already cited in the manuscript draft (ref. 9). In the revised version we have also included information on the lack of association between ANA titer and clinical SLE activity (page 6, line 2-3).

2. Specific solid phase immunoassays have largely replaced immunodiffusion tests and looking at patterns: L Cook *Clin Immunol Immunopath* 1998; 88:211-20

**Reply:** We are aware of this, but cannot see the implications for our study, where two antigen-specific methods were used: double radial immunodiffusion (DRID) and/or line blot. Contrasting to other methods, DRID identifies a subgroup of antigen-precipitating antibodies, which in some instances have higher diagnostic specificity (albeit lower sensitivity) than ELISA and other solid-phase assays. We (and other Swedish laboratories) still claim that total replacement of DRID by solid phase assays is not advisable. We advocate that some anti-ENA specificities captured by ELISA should be confirmed with 'gold standard' methods such as immunodiffusion. We and others have discussed this matter in more detail elsewhere (*Dahle C, et al. J Autoimmun* 2004;22:241-48).



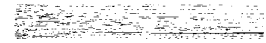

1  
2  
3  
4  
5  
6  
7 3. Homogeneous=diffuse pattern best recognizes the DNA-histone complex (nucleosome) (and this  
8 Ab responsible for the LE cell phenomenon)

9 **Reply:** We cannot see that this remark implies additional work or revision of the manuscript. Of  
10 course, we are well aware of the fact that classical homogenous nuclear IF-staining reflects occur-  
11 rence of antibodies targeting DNA-histone complexes or distinct epitopes on dsDNA or histone pro-  
12 teins alone, but in some cases also to other DNA-associated proteins (see also our response to point  
13 16).

14 4. The peripheral (also called rim) pattern is due to anti-dsDNA, and is not seen well on Hep-2 cells,  
15 but is well seen on mouse/rat liver sections

16 **Reply:** We are also aware of the "rim" (or rim-homogenous) hepatocyte nuclear staining pattern re-  
17 flecting anti-dsDNA on cryostat sections of rat and mouse liver. However, as whole fixed HEp2 cells  
18 have replaced rat liver cryostat sections for routine purposes, we do not think that the rim pattern is a  
19 matter to discuss in the present study.

20 5. The Danish group have described about 20 speckled patterns--major Ab associated with speckled  
21 include anti-Sm, RNP, Ro/SSA, La/SSB, Scl-70, centromere, PCNA

22 **Reply:** Indeed, a multitude of speckled ANA patterns (as well as variants of nucleolar, nuclear dot,  
23 and nuclear membrane staining patterns) have been described. In the present study we found it  
24 adequate to concentrate on four main patterns:  
25 (1) homogenous/nucleosomal, (2) speckled/nucleoplasmic, (3) mixed homogenous/speckled, and (4)  
26 nucleolar. In addition, we describe two small pattern groups (centromeric and "other ANA") that were  
27 not considered large enough for statistical comparisons.

28 6. M Reichlin et al described Ro and La in SLE patients, and a few years later E Tan described SSA  
29 and SSB in patients with Sjogren's--years later they were convinced to exchange reagents, and lo  
30 and behold Ro=SSA and La=SSB--so now we routinely say Ro/SSA and La/SSB

31 **Reply:** In accordance with the reviewer's suggestion, we have changed the nomenclature to Ro/SSA  
32 and La/SSB all through the manuscript.

33 7. For a ACR sponsored review of the significance of anti-Sm and anti-RNP by immunodiffusion and  
34 ELISA (EIA) see: Arth & Rheum 2004; 51:1030-44--which gives better data than cited by the authors

35 **Reply:** This paper has been added to the reference list.

36 8. For the ACR sponsored review of anti-DNA see ARTH RHEUM 2002; 47:546-555

37 **Reply:** This paper has been added to the reference list.

38 9. Solid phase assays (ELISA, EIA) have virtually replaced immunodiffusion for detection of anti-  
39 DNA, ENA etc, in virtually all labs in the USA--more sensitive, easier to do, better QC, automated--  
40 see above #7 and #8

41 **Reply:** Please see our response under point 2.

42 10. Jill Buyon has written more recent ref that you cited#28

43 **Reply:** This reference has been replaced by a more recent publication by Dr Buyon.

44 11. For publication purposes we usually only include SLE patients who have 4 or more ACR criteria--  
45 having less just means they might have SLE (according to the ACR Classification criteria)

46 **Reply:** The 1982 American College of Rheumatology criteria for SLE (ACR-82) were not intended as  
47 diagnostic criteria, but as criteria for the classification of SLE. This means that the clinician may well  
48 diagnose a patient with SLE, although the ACR-82 criteria are not met. Michelle Petri and co-workers  
49 in the Systemic Lupus International Collaborating Clinics (SLICC) group recently demonstrated that  
50 the ACR-82 criteria have a low sensitivity, but a rather high specificity, for SLE (*Arthritis Rheum*  
51 *2012;64:2677-86*).

52 The present study was done to reflect SLE in a real life clinical setting, where 20% of the SLE pa-  
53 tients did not fulfill  $\geq 4/11$  the ACR-82 classification criteria – NB the presence of anti-phospholipid  
54  
55  
56  
57  
58



antibodies (aPL) analyzed by ELISA or as a positive "lupus anticoagulant" test are *not* included in the "immunologic disorder" criterion according to the validated ACR-82 criteria set. Nevertheless, aPL is often applied as a classification criterion with reference to the *non-validated* update of ACR-82 suggested by Dr Hochberg in a short letter to *Arthritis & Rheumatism* in 1997 (*Hochberg MC. Arthritis Rheum 1997;40:1725*). In the revised version of the manuscript, we clearly state that 31 of the 44 (70%) "Fries patients" had positive aPL tests and would thus have been classified as SLE according to the "1997 update". Nevertheless, we have refrained from applying the 1997 update, and chosen to rely on the validated ACR-82 classification criteria. In addition, we respectfully wish to stick to the "Fries' criteria", which we (and others, e.g. *Vikerfors A, et al. Rheumatology 2013;52:501-9*) find helpful as a "clinical check-up" for the clinical *diagnosis of SLE*.

#### 12. ANA patterns may vary over time and at different dilutions

**Reply:** We completely agree with this comment. As mentioned in the *Discussion*, we found in a previous investigation based on South Swedish SLE patients who had all been judged IF-ANA positive at the time-point of diagnosis that a considerable proportion (24%) lost their ANA positivity over time (*Sjöwall C, et al. J Rheumatol 2008;35:1994-2000*). This finding is also in line with the results from a recent clinical trial for belimumab in SLE (*Wallace DJ, et al. Arthritis Rheum 2009;61:1168-78*). However, the present study had a cross-sectional design and aimed to compare the IF-ANA staining patterns from *the time-point of SLE onset* with clinical and laboratory features (see *Patients & Methods*, page 10).

13. Most USA labs use a titer of 1:40 as a cut off--SLE patients who were positive at 1:200 (or greater) who turn negative, may thus in the USA still be positive if they have a titer between 1:40 and 1:200

**Reply:** According to the 1982 ACR criteria, a *positive ANA test* is defined as an *abnormal* titer of ANA judged by immunofluorescence microscopy (or equivalent method). At Swedish laboratories accredited by SWEDAC for ANA diagnostics (ISO 15189), an abnormal ANA titer corresponds to  $\geq 95^{\text{th}}$  percentile among healthy female blood donors, meaning that up to 5% healthy women may be ANA-positive. The actual corresponding *cut-off titer* varies between laboratories depending on the microscope equipment including light source, filter combinations, lens, source and dilution of the fluorochrome-labelled secondary antibodies, etc! As stated in the *Methods* section, the cut-off titer ( $\geq 95^{\text{th}}$  percentile) for positive IF-ANA at our laboratory was 1:200, whereas at a serum dilution of 1:40, 45% of both healthy women and men have a "positive" IF-ANA test (*Sjöwall C, et al. J Rheumatol 2008;35:1994-2000*). Thus, a cut-off titer of 1:40 would be absurd in laboratories with modern equipment!

14. Under results you mention "immunologic disorder"--please define

**Reply:** In the *Results* section of the revised version of the manuscript it has been clarified that 'Immunologic disorder' refers to the definition of the 10<sup>th</sup> criterion according to the 1982 ACR SLE classification criteria (*Tan E, et al. Arthritis Rheum 1982;25:1271-77*). Thus, 'immunologic disorder' is met by at least one of the following:

a) Positive LE cell preparation

OR

b) Anti-DNA: antibody to native DNA in abnormal titer

OR

c) Anti-Sm: presence of antibody to Sm nuclear antigen

OR

d) False positive serologic test for syphilis known to be positive for at least 6 months and confirmed by *Treponema pallidum* immobilization or fluorescent treponemal antibody absorption test .

15. Results: the frequency of renal disease and anti-DNA in your cohort is lower than most other published cohorts--why--is there something unique about your group of patients--usually renal is at least 50%, and anti-DNA about 75%



**Reply:** One plausible explanation for this is that ethnicity is strongly linked to the risk of nephritis (Hopkinson ND, et al. *Ann Rheum Dis* 2000;59:116-19) with a lower frequency of renal involvement in white population. Caucasians constitute 90-95% of patients in Swedish SLE cohorts (93% in this study), and the frequencies of nephritis and anti-dsDNA antibodies do not differ much between Swedish SLE centers (unpublished data from Linköping, Stockholm, Lund, Uppsala and Umeå). For example, the percentage of newly diagnosed SLE patients with renal involvement in the late 1980's was less than 20% in southern Sweden (Ståhl-Hallengren C, et al. *J Rheumatol* 2000;27:685-91). Another likely explanation is the selection of patients. In our region, the Linköping rheumatology unit is the only clinic that diagnoses and treats SLE patients. Thus, we can conclude that about 95% of the expected SLE cases in the catchment area of Linköping and ≥98% of all known SLE cases were included in this study. Consequently, this means that our clinic takes care of the whole spectrum of SLE – from uncomplicated cases with quiescent disease and skin/joint involvement to severely ill individuals with full-blown multisystem disease.

The slightly lower frequency of anti-dsDNA antibody positive individuals observed in our cohort is probably related to the choice of method. The Clinical immunology unit at our hospital has (so far) refrained from the use of other methods for anti-dsDNA antibody detection than the *Crithidia* test (mainly because of its high specificity for SLE compared to solid-phase assays). In addition, gamma-chain specific FITC-conjugate is always used in order to only detect IgG antibodies (although not demanded by the ACR-82 criteria!).

16. Discussion: Friou not Holman and Kunkel described the IF ANA in SLE : with different cell substrates (liver, kidney, Hep-2, other cell lines) see different patterns

**Reply:** As a matter of fact, in 1957 Halsted Holman & Henry Kunkel published a beautiful experimental study where they described that the "LE-cell" phenomenon reflected antinuclear antibodies giving rise to a homogenous nuclear staining pattern of phagocytized ANA-opsonized leukocyte nuclei. They also showed that the autoantibodies had affinity for a nucleoprotein associated with DNA (Holman HR, Kunkel HG. *Science* 1957;126:162-63). Although not representing an orthodox means of ANA-diagnostics, it is undoubtedly an ingenious example of IF-microscopical ANA identification.

17. No association of photosensitivity with Ro:

Paz ML, Gonzalez Maglio DH, Pino M, Ferrari A, Weill FS, Nasswetter G, Leoni J. Anti-ribonucleoprotein autoantibodies in patients with systemic autoimmune diseases. Relation with cutaneous photosensitivity. *Clinical Rheumatology* 2011; 30:209-16.

Boey ML, Peebles CL, Tsay G, et al. Clinical and autoantibody correlations in Orientals with systemic lupus erythematosus. *Ann Rheum Dis* 1988; 47:918-23.

Wang CL, OOI L, Wang F: Prevalence and clinical significance of antibodies to ribonucleoproteins in systemic lupus erythematosus in Malaysia. *Br Soc Rheumatol* 1996, 35:2; 129-32

Mok CC, Lau CS, Chan TM, Wong RWS: Clinical characteristics and outcome of southern Chinese males with systemic lupus erythematosus. *Lupus* 1999;8: 188-96.

Christian N, Smikle MF, DeCeulaer K, Daniels L, Walravens MJ, Barton EN. Antinuclear antibodies and HLA class II alleles in Jamaican patients with systemic lupus erythematosus. *West Indian Med J* 2007; 56: 130-3.

**Reply:** We agree with the reviewer that this question may be controversial. However, when we scrutinized these papers lack of association between photosensitivity and anti-Ro/SSA was evident only in 3 cases (Paz ML, et al. *Clin Rheumatol* 2011; Boey ML, et al. *Ann Rheum Dis* 1988; Wang CL, et al. *Br J Rheumatol* 1996). Thus, these papers were included in the reference list along with the following paper: Sutej PG, et al. *Photosensitivity and anti-Ro (SS-A) antibodies in black patients with systemic lupus erythematosus (SLE)*. *Br J Rheumatol* 1989;28:321-324.

**Reviewer: Catharina Eriksson MD**, Department of Clinical Immunology/Clinical Microbiology, Umeå University, S-901 87 Umeå, Sweden.

1) Page 8, Patients and methods: The authors describe their definition of cut-off level for IF-ANA as >95th percentile for female blood donors, and conclude that this has a very high sensitivity for SLE.

There are indeed 24 men with SLE in the study. The authors have to better describe the cut-off level for and the sensitivity for SLE by the described criteria even for the male patients.

**Reply:** This remark is well taken. However, as mentioned in *Patients & Methods* (page 10) "*IF-ANA staining patterns, anti-ENA reactivity and dsDNA antibodies were analyzed on a routine basis at the Clinical immunology laboratory, Linköping university hospital and were extracted from medical records. In many patients IF-ANA analysis was performed at several occasions over time, but discrepant staining patterns were achieved in less than 5% of these cases. Herein, IF-ANA staining pattern from the time-point most adjacent to SLE onset was used for comparisons with clinical and laboratory features*". Although there is indeed support for the use of different cut-offs for men and women, it is not realistic to perform this on a routine basis. In addition, the vast majority of the SLE cases had ANA titers considerably above 1:200 including all of the 24 men. All three of the ANA negative cases were women.

2) Page 9, Indirect IF microscopy: Line 38 - was the secondary antibody also for anti-dsDNA FITC conjugated gamma-chain specific anti-human IgG? Was the cut-off level for anti-dsDNA also referring to female blood donors?

**Reply:** The secondary FITC-conjugated antibody used in the anti-dsDNA antibody assay was indeed also gamma-chain specific (information now provided in the revised version). The cut-off level for anti-dsDNA referred to 50 female and 50 male healthy blood donors (none of them anti-dsDNA antibody positive).

3) Page 9, Anti-ENA antibodies: SSA should be defined with respect to Ro-60 and Ro-52, and if possible report these separately.

**Reply:** Since this study is based on historical data extracted from medical records (see reply to first comment) from the time-point of SLE onset, complete anti-ENA antibody profiles were unfortunately not available in a majority of the patients.

4) Routine laboratory analyses, page 10: Lupus anticoagulant was analysed, but not anti-cardiolipin antibodies. Why? A comment should be added.

**Reply:** Again, the study is based on historical IF-ANA data from the time-point of SLE onset. While the lupus anticoagulant test (dilute Russell's viper venom test) has been very stable over the years, this has unfortunately not been the case with the anti-cardiolipin antibody assay. In fact, since the 1990's several different assays with different cut-offs have been used at the Clinical immunology unit. Samples that previously were judged as low anti-cardiolipin antibody positive are now negative with the present automated method. Thus, good reproducibility was not reassured with the anti-cardiolipin assay and this is the reason why we chose to exclude these data.

1) A couple of more questions should be of interest to know: did the disease duration, or the number of nuclear antibodies have any impact on the clinical feature?

**Reply:** Since this study is based on historical autoantibody data from the time-point of SLE onset, it does not make sense to compare the antibody patterns/nuclear antibodies with disease duration. However, as suggested by the reviewer, we made additional analyses of the *number of nuclear antibodies* in comparison with IF-ANA patterns (shown in table below). The maximum number of concomitant anti-nuclear antibody fine-specificities recorded was 5 (anti-dsDNA, anti-Sm, anti-Ro/SSA, Anti-La/SSB and anti-snRNP).

|     | 0  | 1  | 2  | 3  | 4 |
|-----|----|----|----|----|---|
| H   | 32 | 52 | 24 | 11 | 0 |
| S   | 11 | 21 | 11 | 4  | 2 |
| N   | 8  | 7  | 2  | 1  | 1 |
| H/S | 6  | 6  | 7  | 5  | 0 |

Patients with 2, 3 or 4 ANA-fine-specificities (none had 5!) were put in one group (three groups were composed; 0, 1 or >1 nuclear antibodies) and proportions of different staining patterns were tested. There were, however, no significant differences in proportions of the number of antibodies over dif-



ferent staining patterns (H, S, N or H/S),  $p=0.29$ . This information is provided in the revised version of the manuscript (page 13-14).

2) Table 1b: If possible - anti-SSA/Ro could be presented in Ro60 and Ro52 separately.

**Reply:** Since this study is based on historical data from the time-point of SLE onset, complete anti-ENA antibody profiles were unfortunately not available in a majority of the patients.

3) In the Introduction the authors refer to a study showing that homogenous ANA pattern is the most common in healthy individuals. There are indeed several publications showing that fine speckled pattern is the most common in healthy persons. The authors have to comment on this subject.

**Reply:** This objection is indeed relevant and well taken. The type of (very) fine-speckled pattern, which has been described in healthy individuals, also reacts with chromatin, which is evident in dividing HEp-2 cells. Therefore, we have actually labelled this pattern as "homogenous ANA". This staining pattern was not seen in the SLE material. We have now modified the text in the *Introduction* section (page 6).

**Reviewer: Shinu John Ph. D.** Department of Immunobiology/Laboratory Medicine, Yale University School of Medicine, USA

Were any of the patients with discrepant staining patterns excluded? The authors have adequately described the status of the patients used in the study but do not comment on exclusion criteria, if any

**Reply:** All SLE patients within the county of Östergötland meeting either the 1982 American College of Rheumatology criteria for SLE (ACR-82) or the "Fries' criteria" (defined in *Patients & Methods*) were offered to take part of this structured follow-up programme. Less than 5% of suitable patients have denied participation for different reasons. The ethical permission did not allow us to use data from patients that refrained from participation in the follow-up programme. No other exclusion criteria were used.

Do the various drug treatments alter the ANA patterns? Since a significant number of patients were on some sort of disease modifying drug, the table should indicate the category of drug and the predominant ANA pattern.

**Reply:** To answer the question raised by the reviewer, one would need a longitudinal study. The present study had a cross-sectional design and aimed to compare the IF-ANA staining patterns from the *time-point of SLE onset* with clinical and laboratory features. Consequently, the vast majority of patients did not have any disease-modifying drug (but possibly glucocorticoids) when the ANA test was performed. Provided data on disease-modifying drugs refer to what the patients were prescribed once the SLE diagnosis was confirmed.

Our experience, however, is that a considerable proportion (24%) of SLE patients lose their ANA positivity over time (Sjöwall C, et al. *J Rheumatol* 2008;35:1994-2000). In the present study, patients that remained ANA positive over time mainly displayed a constant pattern: "In many patients, IF-ANA analysis was performed at several occasions over time but discrepant staining patterns were achieved in less than 5% of these cases" (page 10).

Where mixed ANA patterns are observed, sera should be further diluted and IF assays performed to assess the most dominant pattern

**Reply:** As mentioned in *Patients & Methods* (page 10) "IF-ANA staining patterns, anti-ENA reactivity and dsDNA antibodies were analyzed on a routine basis at the Clinical immunology laboratory, Linköping university hospital and were extracted from medical records." Since further dilution of serum samples with mixed ANA patterns is not part of the clinical routine at our Clinical immunology laboratory, we have no possibilities to perform this.

Please include representative IF images of other ANA (oANA) pattern. Were these patients on any "disease modifying drug"?

1  
2  
3  
4  
5  
6  
7  
8 **Reply:** The 5 SLE patients in the “oANA group” consisted of 1 case with a pattern very rarely seen in  
9 SLE patients (nuclear dots) and in 4 cases the Clinical immunology laboratory was unable to recover  
10 documentation of the IF-ANA patterns, but had classified the samples as “*IF-ANA positive*”. 4 of the-  
11 se 5 individuals were prescribed at least one disease-modifying drug. This information is now given  
12 in the text (page 13).

13 It would be helpful to have RF and Blys/BAFF titers of these patients

14 **Reply:** Unfortunately, neither RF nor Blys/BAFF levels were routinely measured at inclusion in our  
15 cohort. We are not familiar with whether or not RF and Blys/BAFF levels are associated with certain  
16 SLE phenotypes or specific IF-ANA patterns.

17  
18  
19  
20  
21  
22  
23  
24  
25  
26  
27  
28  
29  
30  
31  
32  
33  
34  
35  
36  
37  
38  
39  
40  
41  
42  
43  
44  
45  
46  
47  
48  
49  
50  
51  
52  
53  
54  
55  
56  
57  
58  
59  
60

Or peer review only

1  
2  
3  
4  
5  
6  
7  
8  
9  
10  
11  
12  
13  
14  
15  
16  
17  
18  
19  
20  
21  
22  
23  
24  
25  
26  
27  
28  
29  
30  
31  
32  
33  
34  
35  
36  
37  
38  
39  
40  
41  
42  
43  
44  
45  
46  
47  
48  
49  
50  
51  
52  
53  
54  
55  
56  
57  
58  
59  
60

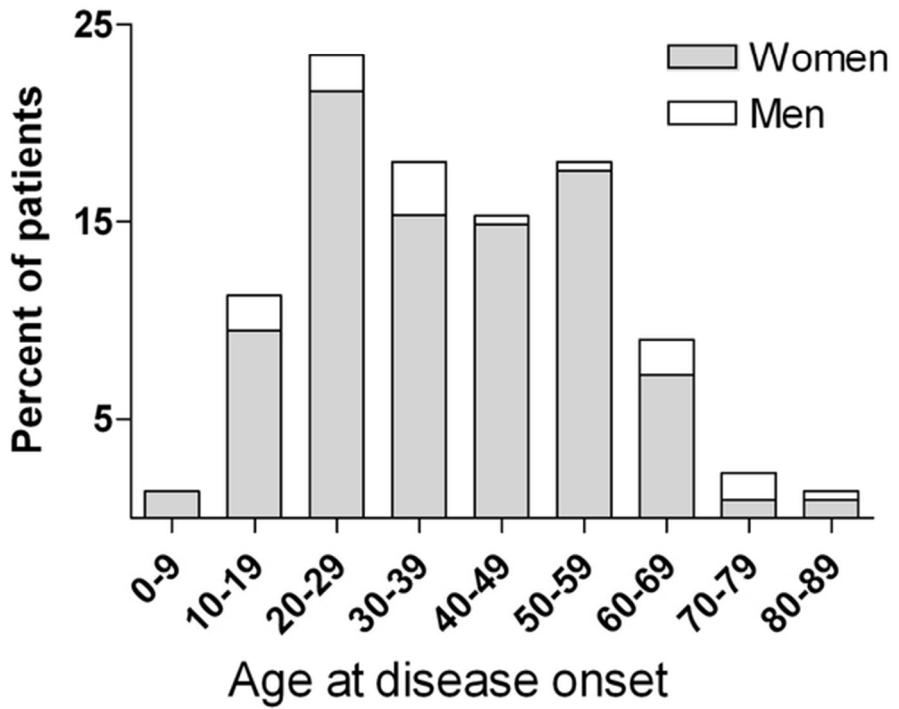

57x45mm (300 x 300 DPI)

Peer Review Only

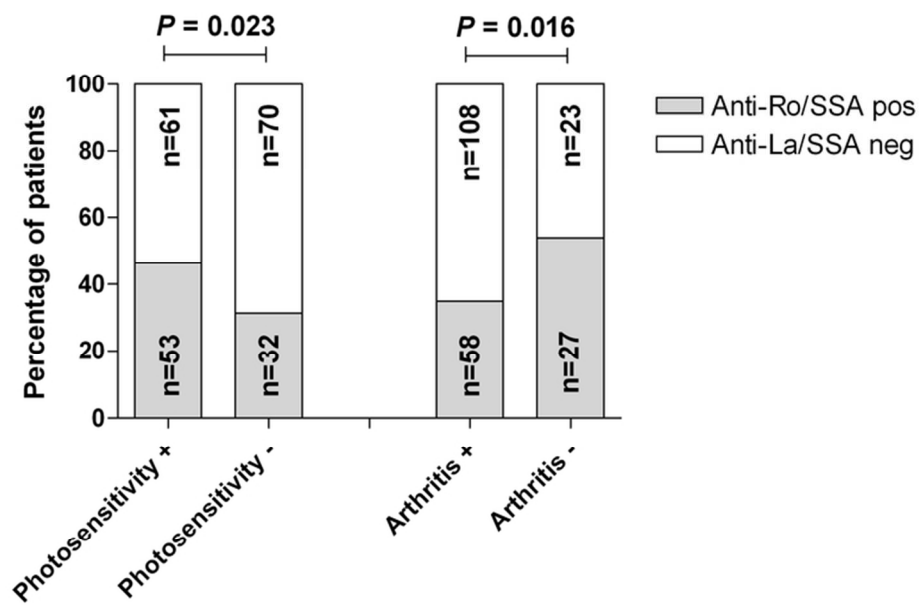

71x46mm (300 x 300 DPI)

Review only

1  
2  
3  
4  
5  
6  
7  
8  
9  
10  
11  
12  
13  
14  
15  
16  
17  
18  
19  
20  
21  
22  
23  
24  
25  
26  
27  
28  
29  
30  
31  
32  
33  
34  
35  
36  
37  
38  
39  
40  
41  
42  
43  
44  
45  
46  
47  
48  
49  
50  
51  
52  
53  
54  
55  
56  
57  
58  
59  
60





28  
29  
30  
31  
32  
33  
34  
35  
36  
37  
38  
39  
40  
41  
42  
43  
44  
45  
46  
47  
48  
49  
50  
51  
52  
53  
54  
55  
56  
57  
58  
59  
60

Figure 3: IF-ANA staining patterns demonstrated for the 219 ever ANA positive SLE patients divided on those who only met the Fries' criteria and those who fulfilled at least 4 out of the 11 ACR-82 criteria.  
57x36mm (300 x 300 DPI)



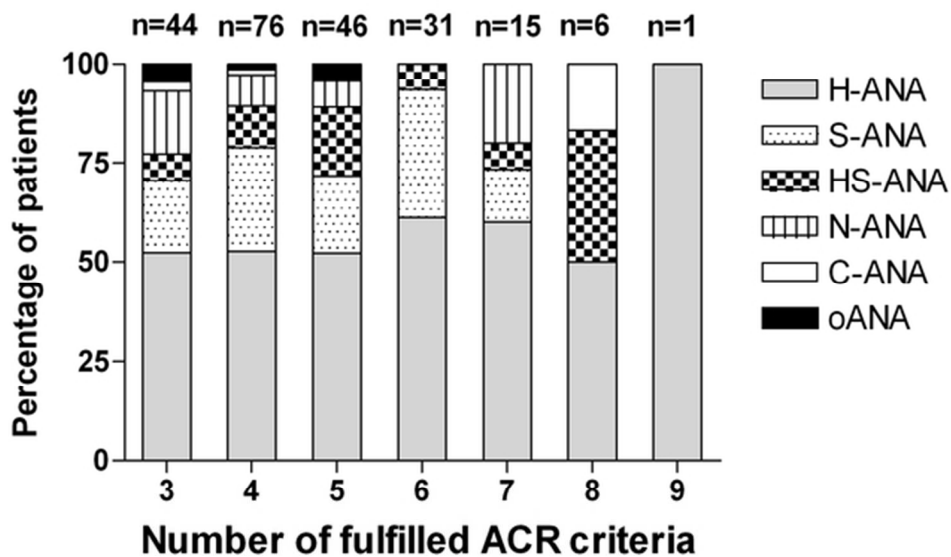

Figure 4: IF-ANA staining patterns demonstrated for the 219 ever ANA positive SLE patients divided on the number of fulfilled ACR-82 criteria.  
56x34mm (300 x 300 DPI)

Review only

1  
2  
3  
4  
5  
6  
7  
8  
9  
10  
11  
12  
13  
14  
15  
16  
17  
18  
19  
20  
21  
22  
23  
24  
25  
26  
27  
28  
29  
30  
31  
32  
33  
34  
35  
36  
37  
38  
39  
40  
41  
42  
43  
44  
45  
46  
47  
48  
49  
50  
51  
52  
53  
54  
55  
56  
57  
58  
59  
60

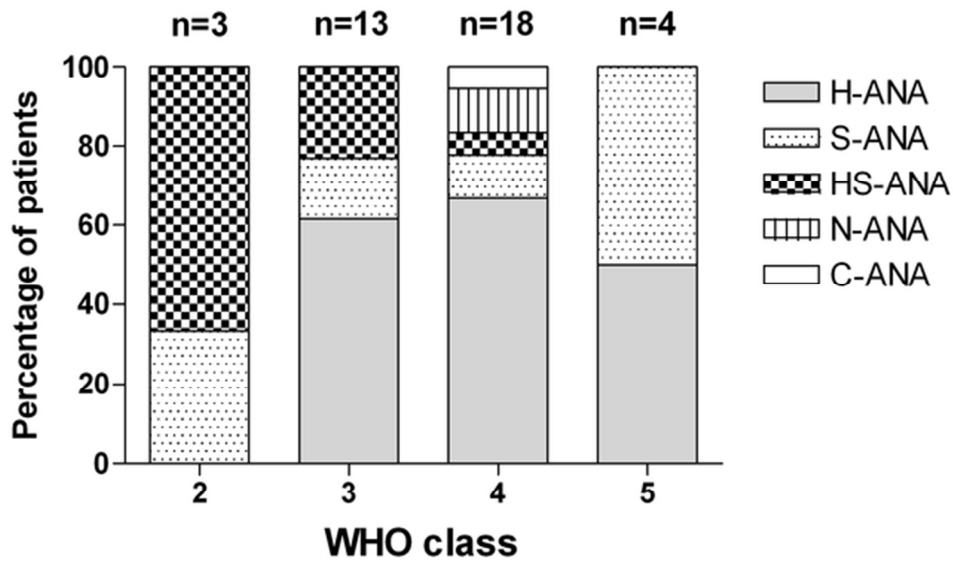

Figure 5: IF-ANA staining patterns demonstrated for the 38 patients that had undergone renal biopsy divided according to the WHO classification for lupus nephritis.  
57x35mm (300 x 300 DPI)

review only
